# Supplementary material for: A Global Perspective on Pyrazinamide Resistance: Systematic Review and Meta-Analysis
Source: PubMed Central journal article supplement (PMC4517823; doi:10.1371/journal.pone.0133869), 2015-07-28
Supplement: pone.0133869.s002.pdf [file pone.0133869.s002.pdf]

| WHO Region and Country |                          | Study Design  | Study Setting | Cohort Type           | Sample Size           | Specimen Type             | Phenotypic Method          | PZase Activity Assay   | Genotypic Method        | Reference             |
|------------------------|--------------------------|---------------|---------------|-----------------------|-----------------------|---------------------------|----------------------------|------------------------|-------------------------|-----------------------|
| Africa                 | Central African Republic | Retrospective | Lab           | N/A                   | 54                    | Sputum                    | N/A                        | No                     | PCR and DNA sequencing  | Minime-Lingoupou 2010 |
|                        | Congo                    | Retrospective | Lab           | MDR                   | 1                     | MTB clinical isolates     | BACTEC 460 (100µg/ml)      | Yes                    | PCR and DNA sequencing  | Mestagh 1999          |
|                        | Kenya                    | Prospective   | Clinical      | Any TB                | 286                   | MTB clinical isolates     | BACTEC 960 (100µg/ml)      | No                     | N/A                     | Ndung'u 2012          |
|                        | Rwanda                   | Retrospective | Lab           | MDR                   | 1                     | MTB clinical isolates     | BACTEC 460 (100µg/ml)      | Yes                    | PCR and DNA sequencing  | Mestagh 1999          |
|                        | Tanzania                 | Retrospective | Lab           | N/A                   | 13                    | MTB clinical isolates     | N/A                        | No                     | PCR and DNA sequencing  | Mpagama 2013          |
|                        | South Africa             | N/S           | N/S           | HR-MDR                | 27                    | MTB clinical isolates     | BACTEC 460 (100µg/ml)      | Yes                    | PCR and DNA sequencing  | Davies 2000           |
|                        |                          | Retrospective | Lab           | N/A                   | 9                     | MTB clinical isolates     | N/A                        | No                     | Whole genome sequencing | Ioeiger 2009          |
| Retrospective          |                          | Lab           | Any TB        | 26                    | MTB clinical isolates | BACTEC 960 (100µg/ml)     | No                         | Ion Torrent            | Daum 2012               |                       |
| Retrospective          |                          | Lab           | N/A           | 21                    | MTB clinical isolates | BACTEC 460 (100-900µg/ml) | Yes                        | PCR and DNA sequencing | Bishop 2001             |                       |
| Retrospective          |                          | Clinical      | HR-MDR        | 174                   | MTB clinical isolates | BACTEC 960 (100µg/ml)     | No                         | PCR and DNA sequencing | Louw 2006               |                       |
| Retrospective          | Lab                      | MDR; any TB   | 221           | MTB clinical isolates | BACTEC 460 (100µg/ml) | Yes                       | PCR and DNA sequencing     | Mphahlele 2008         |                         |                       |
| Americas               | Brazil                   | Retrospective | Lab           | N/A                   | 40                    | MTB clinical isolates     | Indirect proportion method | Yes                    | PCR and DNA sequencing  | Rodrigues 2005        |
|                        |                          | Retrospective | Lab           | N/A                   | 36                    | MTB clinical isolates     | Proportion method          | Yes                    | PCR and DNA sequencing  | Barco 2006            |
|                        |                          | Prospective   | Clinical      | HR-MDR                | 23                    | Sputum                    | BACTEC 460 (N/S)           | Yes                    | PCR and DNA sequencing  | Clemente 2008         |
|                        |                          | Prospective   | Clinical      | Any TB                | 71                    | MTB clinical isolates     | 7H9 agar                   | Yes                    | N/A                     | Ribeiro 2012          |
|                        |                          | Retrospective | Clinical      | Any TB                | 97                    | MTB clinical isolates     | Proportion method          | Yes                    | PCR and DNA sequencing  | Bhuju 2013            |
|                        |                          | Prospective   | Lab           | Any TB                | 50                    | Sputum                    | BACTEC 460 (100µg/ml)      | No                     | N/A                     | Barreto 2002          |
|                        |                          | Retrospective | Lab           | N/A                   | 32                    | MTB clinical isolates     | N/A                        | Yes                    | PCR and DNA sequencing  | Ghiraldi 2011         |
|                        | Canada                   | Retrospective | Lab           | Any TB                | 28                    | MTB clinical isolates     | Middlebrook 7H11           | Yes                    | PCR and DNA sequencing  | Hirano 1998           |
|                        |                          | Retrospective | Lab           | N/A                   | 28                    | MTB clinical isolates     | BACTEC 460 (100-300µg/ml)  | Yes                    | PCR and DNA sequencing  | Cheng 2000            |
|                        |                          | Prospective   | Lab           | Any TB                | 743                   | MTB clinical isolates     | BACTEC 460/960 (100µg/ml)  | Yes                    | PCR and DNA sequencing  | Chedore 2010          |
|                        |                          | Retrospective | Lab           | Any TB                | 141                   | MTB clinical isolates     | BACTEC 460 (100µg/ml)      | No                     | PCR and DNA sequencing  | Alexander 2012        |
|                        |                          | Retrospective | Lab           | MDR                   | 1                     | MTB clinical isolates     | BACTEC 460 (100µg/ml)      | Yes                    | PCR and DNA sequencing  | Mestagh 1999          |
|                        |                          | Retrospective | Lab           | N/A                   | 354                   | MTB clinical isolates     | BACTEC 460 (100µg/ml)      | Yes                    | PCR and RFLP            | Nguyen 2003           |
|                        | Cuba                     | Retrospective | Lab           | Any TB                | 102                   | MTB clinical isolates     | Nitrate reductase assay    | Yes                    | PCR and DNA sequencing  | Mirabal 2010          |
|                        | Mexico                   | Prospective   | Lab           | HR-MDR                | 127                   | Sputum                    | BACTEC 960 (100µg/ml)      | No                     | PCR and DNA sequencing  | Cuevas-Cordoba 2013   |
|                        |                          | Prospective   | Lab           | Any TB                | 460                   | MTB clinical isolates     | BACTEC 460 (N/S)           | No                     | N/A                     | Granich 2000          |
|                        | Peru                     | Prospective   | Clinical      | HR-MDR                | 29                    | MTB clinical isolates     | N/A                        | Yes                    | PCR and DNA sequencing  | Escalante 1998        |
|                        |                          | Retrospective | Lab           | Any TB                | 185                   | MTB clinical isolates     | BACTEC 460 (100µg/ml)      | Yes                    | PCR and DNA sequencing  | Sheen 2009            |
|                        |                          | Prospective   | Clinical      | MDR                   | 150                   | MTB clinical isolates     | BACTEC 460 (100µg/ml)      | No                     | N/A                     | Becerra 2000          |
| Retrospective          |                          | Clinical      | HR-MDR        | 122                   | MTB clinical isolates | N/A                       | Yes                        | N/A                    | Saravia 2005            |                       |
| United States          | Retrospective            | Lab           | Any TB        | 16                    | MTB clinical isolates | BACTEC 460 (N/S)          | No                         | PCR and DNA sequencing | Sachais 1998            |                       |
|                        | Retrospective            | Lab           | MDR; Any TB   | 48                    | MTB clinical isolates | BACTEC 460 (100µg/ml)     | No                         | N/A                    | LaBombardi 2002         |                       |
|                        | Retrospective            | Lab           | N/A           | 19                    | MTB clinical isolates | BACTEC 460 (100-900µg/ml) | Yes                        | PCR and DNA sequencing | Cheng 2000              |                       |
|                        | Retrospective            | Lab           | N/A           | 60                    | MTB clinical isolates | Middlebrook 7H11          | Yes                        | PCR and DNA sequencing | Morlock 2000            |                       |
|                        | Retrospective            | Lab           | N/A           | 1436                  | MTB clinical isolates | BACTEC 460 (100µg/ml)     | No                         | PCR and DNA sequencing | Hannan 2001             |                       |
|                        | Retrospective            | Lab           | N/A           | 33                    | MTB clinical isolates | BACTEC 460 (100µg/ml)     | Yes                        | PCR and DNA sequencing | Denkin 2005             |                       |
|                        | Retrospective            | Lab           | Any TB        | 54                    | MTB clinical isolates | BACTEC 460/960 (100µg/ml) | No                         | N/A                    | Fredriks 2006           |                       |
|                        | Retrospective            | Lab           | N/A           | 29                    | MTB clinical isolates |                           | No                         | PCR and DNA sequencing | Dormandy 2007           |                       |

|                       |                     |                      |            |             |                       |                           |                                                    |                        |                        |                   |
|-----------------------|---------------------|----------------------|------------|-------------|-----------------------|---------------------------|----------------------------------------------------|------------------------|------------------------|-------------------|
|                       |                     | Prospective          | Lab        | Any TB      | 27                    | MTB clinical isolates     | BACTEC 460 (6.25-50µg/ml)<br>BACTEC 960 (100µg/ml) | No                     | N/A                    | Duque 2013        |
| East Med.             | <b>Iran</b>         | Prospective          | Clinical   | N/A         | 49                    | MTB clinical isolates     | Middlebrook 7H9                                    | Yes                    | PCR and DNA sequencing | Doustdar 2009     |
|                       | <b>Yemen</b>        | Retrospective        | Lab        | Any TB      | 31                    | MTB clinical isolates     | Middlebrook 7H11                                   | Yes                    | PCR and DNA sequencing | Hirano 1998       |
|                       | <b>Pakistan</b>     | Prospective          | Clinical   | MDR         | 30                    | MTB clinical isolates     | BACTEC 960 (50-100µg/ml)                           | No                     | N/A                    | Khurram 2012      |
|                       | <b>Saudi Arabia</b> | Prospective          | Lab        | Any TB      | 101                   | MTB clinical isolates     | BACTEC (N/S)                                       | No                     | N/A                    | Khan 2001         |
| Europe                | <b>Abkhazia</b>     | Prospective          | Clinical   | MDR         | 37                    | Sputum                    | BACTEC 960 (100µg/ml)                              | No                     | N/A                    | Pardini 2007      |
|                       | <b>Azerbaijan</b>   | Retrospective        | Lab        | MDR         | 5                     | MTB clinical isolates     | BACTEC 460 (100µg/ml)                              | Yes                    | PCR and DNA sequencing | Mestagh 1999      |
|                       | <b>Belgium</b>      | Retrospective        | Lab        | N/A         | 138                   | MTB clinical isolates     | BACTEC 960 (100µg/ml)                              | No                     | PCR and DNA sequencing | Stoffels 2012     |
|                       |                     | Retrospective        | Lab        | MDR         | 2                     | MTB clinical isolates     | BACTEC 460 (100µg/ml)                              | Yes                    | PCR and DNA sequencing | Mestagh 1999      |
|                       | <b>France</b>       | Retrospective        | Lab        | Any TB      | 35                    | MTB clinical isolates     | Middlebrook 7H10                                   | Yes                    | PCR and DNA sequencing | Lemaitre 1999     |
|                       | <b>Germany</b>      | Retrospective        | Lab        | N/A         | 9                     | MTB clinical isolates     | BACTEC 460 (100µg/ml)                              | No                     | PCR and DNA sequencing | Napiorkowska 2014 |
|                       | <b>Greece</b>       | Prospective          | Lab        | Any TB      | 150                   | MTB clinical isolates     | BACTEC 460/960 (100µg/ml)                          | No                     | N/A                    | Kontos 2003       |
|                       | <b>Italy</b>        | Retrospective        | Lab        | Any TB      | 337                   | MTB clinical isolates     | BACTEC 460 (N/S)                                   | No                     | N/A                    | Nutuni 1998       |
|                       |                     | Retrospective        | Lab        | MDR; HR-MDR | 46                    | MTB clinical isolates     | BACTEC 460 (100µg/ml)                              | No                     | N/A                    | Fattorini 1999    |
|                       |                     | Retrospective        | Lab        | Any TB      | 100                   | MTB clinical isolates     | BACTEC 460/960 (100µg/ml)                          | No                     | N/A                    | Scarpato 2004     |
|                       |                     | Retrospective<br>N/S | Lab<br>N/S | MDR; Any TB | 201                   | MTB clinical isolates     | BACTEC 960 (100µg/ml)                              | No                     | PCR and DNA sequencing | Piersimoni 2013   |
|                       | <b>Latvia</b>       | Retrospective        | Clinical   | N/A         | 28                    | MTB clinical isolates     | BACTEC 460 (N/S)                                   | No                     | PCR and DNA sequencing | Tracevska 2004    |
|                       | <b>Netherlands</b>  | Retrospective        | Lab        | Any TB      | 1831                  | MTB clinical isolates     | BACTEC 960 (100µg/ml)                              | No                     | PCR and DNA sequencing | Simons 2012       |
|                       | <b>Poland</b>       | Retrospective        | Lab        | Any TB      | 33                    | MTB clinical isolates     | BACTEC 960 (100µg/ml)                              | Yes                    | PCR and DNA sequencing | Sekiguchi 2007    |
|                       |                     | Retrospective        | Lab        | Any TB      | 1909                  | MTB clinical isolates     | BACTEC 460 (100µg/ml)                              | No                     | N/A                    | Napiorkowska 2010 |
|                       |                     | Retrospective        | Lab        | N/A         | 72                    | MTB clinical isolates     | BACTEC 460 (100µg/ml)                              | No                     | PCR and DNA sequencing | Napiorkowska 2014 |
|                       | <b>Portugal</b>     | Retrospective        | Clinical   | N/A         | 55                    | MTB clinical isolates     | BACTEC 960 (100µg/ml)                              | Yes                    | PCR and DNA sequencing | Portugal 2004     |
|                       |                     | Retrospective        | Lab        | MDR         | 58                    | MTB clinical isolates     | BACTEC 960 (100µg/ml)                              | No                     | PCR and DNA sequencing | Perdigao 2008     |
|                       | <b>Russia</b>       | Prospective          | Clinical   | N/A         | 44                    | MTB clinical isolates     | BACTEC 460 (100µg/ml)                              | Yes                    | PCR and DNA sequencing | Marttila 1999     |
|                       |                     | Prospective          | Prison     | N/A         | 75                    | MTB clinical isolates     | N/A                                                | No                     | PCR and DNA sequencing | Shemyakin 2004    |
| Prospective           |                     | Clinical             | N/A        | 21          | MTB clinical isolates | N/A                       | No                                                 | PCR and DNA sequencing | Zhdanova 2013          |                   |
| Retrospective         |                     | Lab                  | MDR        | 3           | MTB clinical isolates | BACTEC 460 (100µg/ml)     | Yes                                                | PCR and DNA sequencing | Mestagh 1999           |                   |
| <b>Spain</b>          | Retrospective       | Lab                  | N/A        | 50          | MTB clinical isolates | BACTEC 460 (100µg/ml)     | No                                                 | PCR and DNA sequencing | Aragon 2007            |                   |
|                       | Retrospective       | Clinical             | Any TB     | 57          | MTB clinical isolates | BACTEC 460 (100µg/ml)     | No                                                 | PCR and DNA sequencing | Espasa 2012            |                   |
| <b>Scotland</b>       | Retrospective       | Lab                  | Any TB     | 6           | MTB clinical isolates | BACTEC 460 (100µg/ml)     | Yes                                                | PCR and DNA sequencing | Mestagh 1999           |                   |
| <b>Sweden</b>         | Retrospective       | Lab                  | N/A        | 69          | MTB clinical isolates | BACTEC 460 (100µg/ml)     | No                                                 | PCR and DNA sequencing | Jureen 2008            |                   |
|                       | Prospective         | Lab                  | N/A        | 52          | MTB clinical isolates | BACTEC 960 (100µg/ml)     | No                                                 | PCR and DNA sequencing | Hoffner 2013           |                   |
|                       | Retrospective       | Clinical             | N/A        | 46          | MTB clinical isolates | BACTEC 460/960 (100µg/ml) | Yes                                                | PCR and DNA sequencing | Werngren 2012          |                   |
| <b>Turkey</b>         | Retrospective       | Lab                  | N/A        | 10          | MTB clinical isolates | BACTEC 460 (100µg/ml)     | Yes                                                | PCR and DNA sequencing | Brown 2000             |                   |
|                       | Retrospective       | Lab                  | N/A        | 12          | MTB clinical isolates | BACTEC 460 (N/S)          | Yes                                                | PCR and DNA sequencing | Yuksel 2009            |                   |
| <b>United Kingdom</b> | Retrospective       | Lab                  | Any TB     | 20899       | MTB clinical isolates | BACTEC 460 (100µg/ml)     | No                                                 | N/A                    | Djuretic 2002          |                   |
| South East Asia       | <b>Bangladesh</b>   | Retrospective        | Lab        | MDR         | 4                     | MTB clinical isolates     | BACTEC 460 (100µg/ml)                              | Yes                    | PCR and DNA sequencing | Mestagh 1999      |
|                       | <b>India</b>        | Retrospective        | Lab        | Any TB      | 10                    | MTB clinical isolates     | Middlebrook 7H11                                   | Yes                    | PCR and DNA sequencing | Hirano 1998       |
|                       |                     | Prospective          | Clinical   | N/A         | 65                    | Sputum                    | N/A                                                | No                     | PCR and DNA sequencing | Stavrum 2009      |
|                       |                     | Retrospective        | Clinical   | N/A         | 77                    | MTB clinical isolates     | N/S                                                | No                     | PCR and DNA sequencing | Harris 2000       |
|                       | Prospective         | Clinical             | HR-MDR     | 50          | Sputum                | Proportion method         | Yes                                                | PCR and DNA sequencing | Muthaiah 2010          |                   |

|                        |                         |                                                                                                                                    |                                                                        |                                                                |                                               |                                                                                                                                                                                    |                                                                                                                                                   |                                                    |                                                                                                                                                                                                              |                                                                                                         |
|------------------------|-------------------------|------------------------------------------------------------------------------------------------------------------------------------|------------------------------------------------------------------------|----------------------------------------------------------------|-----------------------------------------------|------------------------------------------------------------------------------------------------------------------------------------------------------------------------------------|---------------------------------------------------------------------------------------------------------------------------------------------------|----------------------------------------------------|--------------------------------------------------------------------------------------------------------------------------------------------------------------------------------------------------------------|---------------------------------------------------------------------------------------------------------|
|                        |                         | N/S<br>Retrospective<br>Prospective<br>Retrospective<br>Retrospective                                                              | Clinical<br>Lab<br>Clinical<br>Lab<br>Lab                              | Any TB<br>N/A<br>N/A<br>Any TB<br>Any TB                       | 130<br>107<br>63<br>136<br>186                | MTB clinical isolates<br>MTB clinical isolates<br>MTB clinical isolates<br>MTB clinical isolates<br>MTB clinical isolates                                                          | BACTEC 960 (100µg/ml)<br>Proportion method<br>BACTEC 960 (100µg/ml)<br>BACTEC 960 (100µg/ml)<br>BACTEC 960 (100µg/ml)                             | Yes<br>Yes<br>Yes<br>Yes<br>No                     | N/A<br>N/A<br>PCR and DNA sequencing<br>N/A<br>N/A                                                                                                                                                           | Krishnamurthy 2004<br>Singh 2007<br>Shenai 2009<br>Sharma 2010<br>Arora 2013                            |
|                        | <b>East Timor</b>       | Prospective                                                                                                                        | Clinical                                                               | MDR; HR-MDR                                                    | 23                                            | MTB clinical isolates                                                                                                                                                              | N/A                                                                                                                                               | Yes                                                | N/A                                                                                                                                                                                                          | Kelly 2004                                                                                              |
|                        | <b>Indonesia</b>        | Retrospective<br>Prospective                                                                                                       | Lab<br>Clinical                                                        | Any TB<br>Any TB                                               | 8<br>103                                      | MTB clinical isolates<br>MTB clinical isolates                                                                                                                                     | Middlebrook 7H11<br>N/A                                                                                                                           | Yes<br>Yes                                         | PCR and DNA sequencing<br>N/A                                                                                                                                                                                | Hirano 1998<br>Kelly 2006                                                                               |
|                        | <b>Myanmar</b>          | Retrospective                                                                                                                      | Lab                                                                    | Any TB                                                         | 16                                            | MTB clinical isolates                                                                                                                                                              | Middlebrook 7H11                                                                                                                                  | Yes                                                | PCR and DNA sequencing                                                                                                                                                                                       | Hirano 1998                                                                                             |
|                        | <b>Thailand</b>         | Retrospective<br>Prospective<br>Retrospective<br>Retrospective<br>Retrospective                                                    | Lab<br>Lab<br>Lab<br>Lab<br>Lab                                        | Any TB<br>Any TB<br>N/A<br>N/A<br>MDR; Any TB                  | 54<br>30<br>42<br>98<br>150                   | MTB clinical isolates<br>MTB clinical isolates<br>MTB clinical isolates<br>MTB clinical isolates<br>MTB clinical isolates                                                          | Middlebrook 7H11<br>BACTEC 960 (100µg/ml)<br>BACTEC 960 (100µg/ml)<br>BACTEC 960 (100µg/ml)<br>BACTEC 960 (100µg/ml)                              | Yes<br>No<br>No<br>No<br>Yes                       | PCR and DNA sequencing<br>N/A<br>PCR and DNA sequencing<br>PCR and DNA sequencing<br>PCR and DNA sequencing                                                                                                  | Hirano 1998<br>Duque 2013<br>Watcharasamphankul 2013<br>Pholwat 2014<br>Jonmalung 2010                  |
| <b>Western Pacific</b> | <b>Cambodia</b>         | Retrospective                                                                                                                      | Lab                                                                    | N/A                                                            | 166                                           | MTB clinical isolates                                                                                                                                                              | N/A                                                                                                                                               | No                                                 | PCR and DNA sequencing                                                                                                                                                                                       | Pierre-Audigier 2012                                                                                    |
|                        | <b>China</b>            | Retrospective<br>Retrospective<br>Prospective<br>Prospective<br>Prospective<br>Retrospective<br>Prospective                        | Lab<br>Lab<br>Clinical<br>Clinical<br>Clinical<br>Clinical<br>Clinical | N/A<br>N/A<br>Any TB<br>N/A<br>Any TB<br>Any TB<br>MDR; Any TB | 64<br>47<br>51<br>53<br>432<br>132<br>218     | MTB clinical isolates<br>MTB clinical isolates<br>MTB clinical isolates<br>Sputum<br>MTB clinical isolates<br>MTB clinical isolates<br>MTB clinical isolates                       | BACTEC 460 (100µg/ml)<br>Proportion method<br>BACTEC 960 (100µg/ml)<br>N/A<br>BACTEC 960 (100µg/ml)<br>Proportion method<br>BACTEC 960 (100µg/ml) | No<br>Yes<br>Yes<br>Yes<br>Yes<br>Yes<br>No        | PCR and DNA sequencing<br>PCR and DNA sequencing<br>PCR and DNA sequencing<br>Long fragment qPCR<br>PCR and DNA sequencing<br>PCR and DNA sequencing<br>PCR and DNA sequencing                               | Hou 2000<br>Zhang 2009<br>Zhou 2011<br>Li 2014<br>Cui 2013<br>Huang 2013<br>Tan 2013                    |
|                        | <b>Malaysia</b>         | Retrospective                                                                                                                      | Lab                                                                    | Any TB                                                         | 1                                             | MTB clinical isolates                                                                                                                                                              | Middlebrook 7H11                                                                                                                                  | Yes                                                | PCR and DNA sequencing                                                                                                                                                                                       | Hirano 1998                                                                                             |
|                        | <b>New Zealand</b>      | Prospective                                                                                                                        | Lab                                                                    | N/A                                                            | 33                                            | MTB clinical isolates                                                                                                                                                              | BACTEC 460/960 (100µg/ml)                                                                                                                         | Yes                                                | PCR and DNA sequencing                                                                                                                                                                                       | Pandey 2009                                                                                             |
|                        | <b>Philippines</b>      | Retrospective                                                                                                                      | Lab                                                                    | Any TB                                                         | 12                                            | MTB clinical isolates                                                                                                                                                              | Middlebrook 7H11                                                                                                                                  | Yes                                                | PCR and DNA sequencing                                                                                                                                                                                       | Hirano 1998                                                                                             |
|                        | <b>Papua New Guinea</b> | Retrospective                                                                                                                      | Clinical                                                               | MDR                                                            | 39                                            | MTB clinical isolates                                                                                                                                                              | BACTEC 460/960 (100µg/ml)                                                                                                                         | No                                                 | N/A                                                                                                                                                                                                          | Simpson 2011                                                                                            |
|                        | <b>Korea</b>            | Retrospective<br>Retrospective<br>Retrospective<br>Retrospective<br>Retrospective<br>Prospective<br>Retrospective<br>Retrospective | Lab<br>Lab<br>Lab<br>Clinical<br>Lab<br>Clinical<br>Clinical<br>Lab    | Any TB<br>N/A<br>N/A<br>HR-MDR<br>N/A<br>N/A<br>N/A<br>N/A     | 8<br>10<br>95<br>93<br>80<br>102<br>23<br>192 | MTB clinical isolates<br>MTB clinical isolates<br>MTB clinical isolates<br>Sputum<br>MTB clinical isolates<br>MTB clinical isolates<br>Extrapulmonary MTB<br>MTB clinical isolates | Middlebrook 7H11<br>Proportion method<br>N/A<br>N/A<br>N/A<br>Proportion method<br>N/A<br>Absolute concentration method                           | Yes<br>Yes<br>Yes<br>Yes<br>Yes<br>Yes<br>No<br>No | PCR and DNA sequencing<br>PCR and DNA sequencing | Hirano 1998<br>Cheng 2000<br>Lee 2001<br>Choi 2010<br>Yoon 2012<br>Kim 2012<br>Lee 2012<br>Jnawali 2013 |
|                        | <b>Taiwan</b>           | Retrospective<br>Retrospective<br>Prospective<br>Prospective                                                                       | Clinical<br>Clinical<br>Clinical<br>Lab                                | MDR; Any TB<br>Any TB<br>MDR<br>MDR; Any TB                    | 76<br>611<br>66<br>56                         | MTB clinical isolates<br>MTB clinical isolates<br>MTB clinical isolates<br>MTB clinical isolates                                                                                   | BACTEC 960 (100-300µg/ml)<br>N/A<br>BACTEC 960 (100µg/ml)<br>BACTEC 960 (100µg/ml)                                                                | Yes<br>Yes<br>Yes<br>No                            | PCR and DNA sequencing<br>N/A<br>PCR and DNA sequencing<br>N/A                                                                                                                                               | Huang 2003<br>Su 2008<br>Chiou 2011<br>Huang 2013                                                       |
|                        | <b>Vietnam</b>          | Retrospective                                                                                                                      | Clinical                                                               | Any TB                                                         | 339                                           | MTB clinical isolates                                                                                                                                                              | N/A                                                                                                                                               | Yes                                                | Line probe                                                                                                                                                                                                   | Van Hung 2013                                                                                           |
