# Supplementary material for: A Global Perspective on Pyrazinamide Resistance: Systematic Review and Meta-Analysis
Source: PubMed Central journal article supplement (PMC4517823; doi:10.1371/journal.pone.0133869), 2015-07-28
Supplement: pone.0133869.s003.pdf [file pone.0133869.s003.pdf]

| SNP location    | SNP type                                      | Country and reference                                                                                                                                                                                                                                                                                                                | Phenotype linked to SNP                                       | SNP Frequency |
|-----------------|-----------------------------------------------|--------------------------------------------------------------------------------------------------------------------------------------------------------------------------------------------------------------------------------------------------------------------------------------------------------------------------------------|---------------------------------------------------------------|---------------|
| -71             | 1-bp deletion                                 | Korea <sup>1</sup>                                                                                                                                                                                                                                                                                                                   | R                                                             | 5             |
|                 | 2-bp deletion                                 | Korea <sup>1</sup>                                                                                                                                                                                                                                                                                                                   | R                                                             | 1             |
| -71 & -11       | 1-bp deletion & A>G                           | Korea <sup>1</sup>                                                                                                                                                                                                                                                                                                                   | R                                                             | 2             |
| -71 & 20        | 1-bp deletion & T>G                           | Korea <sup>1</sup>                                                                                                                                                                                                                                                                                                                   | R                                                             | 1             |
| -71 & 56 & 386  | 1-bp deletion & A insertion & 10-bp insertion | Korea <sup>1</sup>                                                                                                                                                                                                                                                                                                                   | R                                                             | 1             |
| -71 & 58 & 400  | 1-bp deletion & G>A & G>A                     | Korea <sup>1</sup>                                                                                                                                                                                                                                                                                                                   | R                                                             | 1             |
| -71 & 67        | 1-bp deletion & C insertion                   | Korea <sup>1</sup>                                                                                                                                                                                                                                                                                                                   | R                                                             | 1             |
| -71 & 152       | 1-bp deletion & A>C                           | Korea <sup>1</sup>                                                                                                                                                                                                                                                                                                                   | R                                                             | 1             |
| -71 & 161       | 2-bp deletion & C>T                           | Korea <sup>1</sup>                                                                                                                                                                                                                                                                                                                   | R                                                             | 1             |
| -71 & 199       | 1-bp deletion & T>C                           | Korea <sup>1</sup>                                                                                                                                                                                                                                                                                                                   | R                                                             | 1             |
| -71 & 226       | 1-bp deletion & A>C                           | Korea <sup>1</sup>                                                                                                                                                                                                                                                                                                                   | R                                                             | 1             |
| -71 & 298       | 1-bp deletion & A>C                           | Korea <sup>1</sup>                                                                                                                                                                                                                                                                                                                   | R                                                             | 1             |
| -71 & 307       | 1-bp deletion & T>C                           | Korea <sup>1</sup>                                                                                                                                                                                                                                                                                                                   | R                                                             | 1             |
| -71 & 403       | 1-bp deletion & A>C                           | Korea <sup>1</sup>                                                                                                                                                                                                                                                                                                                   | R                                                             | 3             |
| -71 & 446 & 501 | 1-bp deletion & T insertion and T insertion   | Korea <sup>1</sup>                                                                                                                                                                                                                                                                                                                   | R                                                             | 1             |
| -71 & 454       | 1-bp deletion & 10-bp deletion                | Korea <sup>1</sup>                                                                                                                                                                                                                                                                                                                   | R                                                             | 1             |
| -71 & 478       | 1-bp deletion & A>C                           | Korea <sup>1</sup>                                                                                                                                                                                                                                                                                                                   | R                                                             | 1             |
| -16             | AACGTA>GGCAGTT                                | USA <sup>33</sup>                                                                                                                                                                                                                                                                                                                    | R                                                             | 1             |
| -15 & 11        | A>C & T>C                                     | Sweden <sup>57</sup>                                                                                                                                                                                                                                                                                                                 | R                                                             | 1             |
| -13             | G>T                                           | Canada <sup>64</sup>                                                                                                                                                                                                                                                                                                                 | R                                                             | 1             |
| -12             | T>C                                           | South Africa <sup>3</sup> , Netherlands <sup>41</sup>                                                                                                                                                                                                                                                                                | R <sup>3,41</sup>                                             | 3             |
|                 | T>G                                           | Russia <sup>4</sup>                                                                                                                                                                                                                                                                                                                  | R                                                             | 1             |
|                 | T deletion                                    | Iran <sup>2</sup>                                                                                                                                                                                                                                                                                                                    | R                                                             | 1             |
| -12 & 228       | T>C & T>C                                     | Korea <sup>5</sup>                                                                                                                                                                                                                                                                                                                   | R                                                             | 1             |
| -11             | 80-bp deletion                                | Korea <sup>1</sup>                                                                                                                                                                                                                                                                                                                   | R                                                             | 1             |
| -11 & 376       | 80-bp deletion & G>A                          | Korea <sup>1</sup>                                                                                                                                                                                                                                                                                                                   | R                                                             | 1             |
| -11             | A>G                                           | Korea <sup>1,5,6,7</sup> , Iran <sup>2</sup> , Russia <sup>4</sup> , Thailand <sup>8</sup> , Portugal <sup>9</sup> , Scotland <sup>10</sup> , Brazil <sup>49</sup> , Canada <sup>12,64</sup> , Peru <sup>13</sup> , China <sup>31,47</sup> , Sweden <sup>38</sup> , India <sup>50</sup> , Spain <sup>59</sup> , Poland <sup>66</sup> | R <sup>1,2,4,5,6,7,8,9,10,12,13,31,38,47,49,50,59,64,66</sup> | 62            |
| -11 & 483       | A>G & G>A                                     | India <sup>50</sup>                                                                                                                                                                                                                                                                                                                  | R                                                             | 1             |
| -11 & 535       | A>G & A deletion                              | India <sup>50</sup>                                                                                                                                                                                                                                                                                                                  | R                                                             | 1             |
| -11             | A>C                                           | Thailand <sup>8</sup>                                                                                                                                                                                                                                                                                                                | R                                                             | 1             |
| -10             | T>C                                           | South Africa <sup>3</sup>                                                                                                                                                                                                                                                                                                            | R                                                             | 1             |
| -7              | T>C                                           | USA <sup>33</sup>                                                                                                                                                                                                                                                                                                                    | R                                                             | 1             |
| -7 & 340        | T>C & A>G                                     | Japan <sup>14</sup>                                                                                                                                                                                                                                                                                                                  | R                                                             | 2             |
| -3              | C insertion                                   | Sweden <sup>57</sup>                                                                                                                                                                                                                                                                                                                 | *R/S                                                          | 1             |
| 1               | 561-bp deletion                               | Japan <sup>46</sup>                                                                                                                                                                                                                                                                                                                  | R                                                             | 1             |
|                 | 11-bp deletion                                | China <sup>15</sup>                                                                                                                                                                                                                                                                                                                  | R                                                             | 1             |
|                 | 8-bp deletion                                 | China <sup>15</sup>                                                                                                                                                                                                                                                                                                                  | R                                                             | 1             |
| 2               | T>C                                           | Portugal <sup>9,35</sup> , Poland <sup>66</sup>                                                                                                                                                                                                                                                                                      | R <sup>9,35,66</sup>                                          | 9             |
| 3               | G>A                                           | Japan <sup>16</sup> , Netherlands <sup>41</sup>                                                                                                                                                                                                                                                                                      | R <sup>16,41</sup>                                            | 4             |
|                 | G>T                                           | Korea <sup>6</sup>                                                                                                                                                                                                                                                                                                                   | R                                                             | 1             |
| 7               | G>C                                           | Iran <sup>2</sup> , Brazil <sup>11,17</sup> , France <sup>37</sup>                                                                                                                                                                                                                                                                   | R <sup>2,11,17,37</sup>                                       | 4             |
|                 | G>T                                           | Taiwan <sup>18</sup>                                                                                                                                                                                                                                                                                                                 | R                                                             | 1             |
| 8               | C>A                                           | Korea <sup>1,20</sup> , Japan <sup>14,19,46</sup>                                                                                                                                                                                                                                                                                    | R <sup>1,14,19,20,46</sup>                                    | 6             |
| 8 & 419         | C>A & G>A                                     | Japan <sup>14</sup>                                                                                                                                                                                                                                                                                                                  | R                                                             | 1             |
| 11              | T>C                                           | Korea <sup>1</sup> , Peru <sup>32</sup> , USA <sup>33</sup> , China <sup>34,47</sup> , Japan <sup>36</sup>                                                                                                                                                                                                                           | R <sup>1,32,33,34,36,47</sup>                                 | 7             |
|                 | T>G                                           | Korea <sup>1,6</sup>                                                                                                                                                                                                                                                                                                                 | R <sup>1,6</sup>                                              | 2             |
| 12              | G deletion                                    | Cuba <sup>56</sup>                                                                                                                                                                                                                                                                                                                   | R                                                             | 1             |
| 12 & 421        | T insertion & C>T                             | Korea <sup>1</sup>                                                                                                                                                                                                                                                                                                                   | R                                                             | 1             |
| 13              | AT insertion                                  | India <sup>58</sup>                                                                                                                                                                                                                                                                                                                  | R                                                             | 2             |
| 14              | T>A                                           | Japan <sup>16,46</sup>                                                                                                                                                                                                                                                                                                               | R <sup>16,46</sup>                                            | 2             |
|                 | T>G                                           | Japan <sup>16</sup> , India <sup>50</sup>                                                                                                                                                                                                                                                                                            | R <sup>16,50</sup>                                            | 3             |
| 16              | T>C                                           | South Africa <sup>21</sup>                                                                                                                                                                                                                                                                                                           | R                                                             | 1             |
| 17              | T>G                                           | Korea <sup>20</sup> , China <sup>34</sup>                                                                                                                                                                                                                                                                                            | R <sup>20,34</sup>                                            | 2             |
|                 | T>C                                           | Sweden <sup>38,57,61</sup>                                                                                                                                                                                                                                                                                                           | R <sup>38,57,61</sup>                                         | 3             |
| 19              | G>A                                           | Peru <sup>13</sup>                                                                                                                                                                                                                                                                                                                   | R                                                             | 1             |
|                 | G>T                                           | Korea <sup>6</sup> , Peru <sup>13</sup>                                                                                                                                                                                                                                                                                              | R <sup>6,13</sup>                                             | 2             |
| 19 & 22         | G>C & G>T                                     | Korea <sup>1</sup>                                                                                                                                                                                                                                                                                                                   | R                                                             | 1             |
| 19 & 403        | G>C & A>C                                     | Korea <sup>1</sup>                                                                                                                                                                                                                                                                                                                   | R                                                             | 1             |

|                |                                               |                                                                                                                                                                                                                         |                                                      |    |
|----------------|-----------------------------------------------|-------------------------------------------------------------------------------------------------------------------------------------------------------------------------------------------------------------------------|------------------------------------------------------|----|
| 20             | T>G                                           | Russia <sup>4</sup> , Yemen <sup>22</sup> , Brazil <sup>23</sup> , USA <sup>39</sup>                                                                                                                                    | R <sup>4,22,23,39</sup>                              | 5  |
|                | T>A                                           | Korea <sup>6</sup>                                                                                                                                                                                                      | R                                                    | 1  |
|                | T>C                                           | Brazil <sup>11</sup>                                                                                                                                                                                                    | R                                                    | 1  |
| 20 & 386 & 517 | C insertion & 10-bp insertion & G deletion    | Korea <sup>1</sup>                                                                                                                                                                                                      | R                                                    | 1  |
| 20 & 437       | C insertion & C>T                             | Korea <sup>1</sup>                                                                                                                                                                                                      | R                                                    | 1  |
| 22             | G>T                                           | Russia <sup>4</sup> , Belgium <sup>43</sup>                                                                                                                                                                             | R <sup>4,43</sup>                                    | 2  |
|                | G>A                                           | South Africa <sup>3</sup> , China <sup>34</sup> , Belgium <sup>43</sup>                                                                                                                                                 | R <sup>3,34,43</sup>                                 | 4  |
| 22 & 104       | G>T & T>G                                     | South Africa <sup>3</sup>                                                                                                                                                                                               | R                                                    | 1  |
| 23             | A>G                                           | Korea <sup>6,20</sup> , Spain <sup>59</sup> , Canada <sup>64</sup>                                                                                                                                                      | R <sup>6,20,59,64</sup>                              | 5  |
|                | A>C                                           | China <sup>31</sup>                                                                                                                                                                                                     | R                                                    | 1  |
|                | TCG insertion                                 | Korea <sup>7</sup>                                                                                                                                                                                                      | R                                                    | 1  |
| 24             | C>G                                           | Japan <sup>46</sup>                                                                                                                                                                                                     | R                                                    | 1  |
| 25             | G>T                                           | South Africa <sup>24</sup>                                                                                                                                                                                              | R                                                    | 1  |
| 26             | T>G                                           | Korea <sup>6</sup> , Japan <sup>14</sup>                                                                                                                                                                                | R <sup>6,14</sup>                                    | 2  |
|                | T>C                                           | Korea <sup>6</sup>                                                                                                                                                                                                      | R                                                    | 1  |
| 28             | C>T                                           | Russia <sup>4</sup> , Korea <sup>6,20</sup> , Brazil <sup>11</sup> , Latvia <sup>25</sup> , Belgium <sup>43</sup>                                                                                                       | R <sup>4,6,11,20,25,43</sup>                         | 7  |
|                | C>A                                           | Russia <sup>4</sup> , Spain <sup>59</sup>                                                                                                                                                                               | R <sup>4,59</sup>                                    | 2  |
|                | C deletion                                    | China <sup>15</sup>                                                                                                                                                                                                     | R                                                    | 2  |
| 29             | A>C                                           | Korea <sup>1,6,20</sup> , Myanmar <sup>22</sup> , China <sup>31,48</sup> , USA <sup>33,39</sup> , Japan <sup>36</sup> , Belgium <sup>43</sup> , Spain <sup>59</sup> , Singapore <sup>62</sup> , Poland <sup>19,66</sup> | R <sup>1,6,19,20,22,31,33,36,39,43,48,59,62,66</sup> | 17 |
|                | A>G                                           | Korea <sup>6</sup> , USA <sup>12</sup> , Peru <sup>32</sup> , Cuba <sup>56</sup> , Poland <sup>66</sup>                                                                                                                 | R <sup>6,12,32,56,66</sup>                           | 7  |
| 29 & 295       | A>C & T>G                                     | Korea <sup>6</sup>                                                                                                                                                                                                      | R                                                    | 1  |
| 31 & 34 & 290  | C insertion & G>T & G>A                       | Korea <sup>1</sup>                                                                                                                                                                                                      | R                                                    | 1  |
| 34             | G>A                                           | Korea <sup>5</sup> , USA <sup>39</sup> , Italy <sup>40</sup> , China <sup>63</sup>                                                                                                                                      | R <sup>5,39,40,63</sup>                              | 7  |
| 35             | A>C                                           | Korea <sup>6,20</sup> , USA <sup>12</sup> , China <sup>15,47</sup> , Japan <sup>19</sup> , India <sup>58</sup> , Mexico <sup>26</sup> , Peru <sup>32</sup> , Canada <sup>64</sup>                                       | R <sup>6,12,15,19,20,26,32,47,58,64</sup>            | 20 |
|                | A>G                                           | South Africa <sup>3</sup>                                                                                                                                                                                               | *R/S                                                 | 9  |
|                | G insertion                                   | South Africa <sup>3</sup>                                                                                                                                                                                               | R                                                    | 2  |
| 36             | A>G                                           | Peru <sup>32</sup>                                                                                                                                                                                                      | R                                                    | 2  |
| 37             | T>C                                           | China <sup>31</sup>                                                                                                                                                                                                     | R                                                    | 1  |
| 38             | T>C                                           | France <sup>37</sup>                                                                                                                                                                                                    | R                                                    | 1  |
| 40             | T>C                                           | Korea <sup>1,5,6</sup> , South Africa <sup>3,24,60</sup> , Myanmar <sup>22</sup> , Japan <sup>46</sup> , China <sup>47</sup>                                                                                            | R <sup>1,3,5,6,22,24,46,47,60</sup>                  | 14 |
|                | T>G                                           | Peru <sup>32</sup>                                                                                                                                                                                                      | R                                                    | 3  |
|                | T deletion                                    | South Africa <sup>3</sup>                                                                                                                                                                                               | R                                                    | 1  |
| 41             | G>A                                           | Korea <sup>6,7</sup> , Latvia <sup>25</sup> , China <sup>34</sup>                                                                                                                                                       | R <sup>6,7,25,34</sup>                               | 4  |
| 42             | C>G                                           | Korea <sup>20</sup>                                                                                                                                                                                                     | R                                                    | 1  |
|                | C>A                                           | Poland <sup>66</sup>                                                                                                                                                                                                    | R                                                    | 1  |
| 42 & 307       | C>G & T>C                                     | Latvia <sup>25</sup>                                                                                                                                                                                                    | R                                                    | 1  |
| 42 & 535       | C>A & A deletion                              | India <sup>50</sup>                                                                                                                                                                                                     | R                                                    | 1  |
| 46             | G>A                                           | China <sup>47</sup>                                                                                                                                                                                                     | R                                                    | 1  |
| 49             | G>A                                           | China <sup>34</sup> , Singapore <sup>62</sup>                                                                                                                                                                           | R <sup>34,62</sup>                                   | 2  |
|                | 1-bp deletion                                 | Korea <sup>20</sup>                                                                                                                                                                                                     | R                                                    | 1  |
| 50             | G>A                                           | Thailand <sup>22</sup>                                                                                                                                                                                                  | R                                                    | 1  |
| 52             | T>C                                           | New Zealand <sup>45</sup>                                                                                                                                                                                               | R                                                    | 1  |
|                | G insertion                                   | Canada <sup>12</sup>                                                                                                                                                                                                    | R                                                    | 1  |
| 52 & 161       | T>C & C>T                                     | China <sup>31</sup>                                                                                                                                                                                                     | R                                                    | 1  |
| 54             | 2-bp insertion                                | Japan <sup>16</sup>                                                                                                                                                                                                     | R                                                    | 1  |
| 56             | T>C                                           | China <sup>15</sup> , New Zealand <sup>45</sup>                                                                                                                                                                         | R <sup>15,45</sup>                                   | 2  |
|                | T>G                                           | Thailand <sup>8</sup>                                                                                                                                                                                                   | R                                                    | 1  |
|                | 234-bp deletion                               | Korea <sup>7</sup>                                                                                                                                                                                                      | R                                                    | 1  |
| 57 & 62 & 70   | 3-bp deletion & 4-bp deletion & 5-bp deletion | China <sup>48</sup>                                                                                                                                                                                                     | R                                                    | 1  |
| 59             | 1-bp deletion                                 | China <sup>15</sup>                                                                                                                                                                                                     | R                                                    | 1  |
| 59 & 232       | 1-bp deletion & G>A                           | Japan <sup>14</sup>                                                                                                                                                                                                     | R                                                    | 1  |
| 60             | G deletion                                    | Netherlands <sup>41</sup>                                                                                                                                                                                               | R                                                    | 1  |
| 61             | G insertion                                   | Italy <sup>40</sup> , China <sup>47</sup>                                                                                                                                                                               | R <sup>40,47</sup>                                   | 2  |
| 64             | A deletion                                    | Thailand <sup>65</sup>                                                                                                                                                                                                  | R                                                    | 1  |
| 67             | 1-bp deletion                                 | Korea <sup>20</sup>                                                                                                                                                                                                     | R                                                    | 1  |
|                | C insertion                                   | Korea <sup>1</sup>                                                                                                                                                                                                      | R                                                    | 1  |
| 68             | G>C                                           | Taiwan <sup>18</sup>                                                                                                                                                                                                    | R                                                    | 1  |
| 68-69          | GT>TC                                         | Korea <sup>6</sup>                                                                                                                                                                                                      | R                                                    | 1  |
| 71             | G>A                                           | Turkey <sup>27</sup> , China <sup>31</sup> , Peru <sup>32</sup>                                                                                                                                                         | R <sup>27,31,32</sup>                                | 5  |

|                 |                     |                                                                                                                 |                                                 |    |
|-----------------|---------------------|-----------------------------------------------------------------------------------------------------------------|-------------------------------------------------|----|
|                 | G deletion          | China <sup>15</sup> , USA <sup>33,39</sup>                                                                      | R <sup>15,33,39</sup>                           | 5  |
| 74              | 1-bp deletion       | Korea <sup>20</sup>                                                                                             | R                                               | 1  |
|                 | 5-bp deletion       | Brazil <sup>17</sup>                                                                                            | R                                               | 1  |
| 74-75 & 77 & 83 | CC>AA & C>G & C>A   | Korea <sup>6</sup>                                                                                              | R                                               | 1  |
| 76              | GC insertion        | Brazil <sup>17</sup>                                                                                            | R                                               | 2  |
| 77              | 5-bp insertion      | Korea <sup>1</sup>                                                                                              | R                                               | 1  |
|                 | G deletion          | Korea <sup>6</sup>                                                                                              | R                                               | 1  |
| 78              | G>C                 | India <sup>58</sup>                                                                                             | R                                               | 2  |
| 80              | T>C                 | Thailand <sup>8</sup> , China <sup>47</sup> , India <sup>50</sup>                                               | R <sup>8,47,50</sup>                            | 4  |
| 83              | C>T                 | Taiwan <sup>18</sup>                                                                                            | R                                               | 1  |
| 84              | C deletion          | Russia <sup>4</sup>                                                                                             | R                                               | 1  |
| 89              | C>A                 | China <sup>51</sup>                                                                                             | R                                               | 1  |
| 92              | T>C                 | Thailand <sup>8</sup>                                                                                           | *R/S                                            | 13 |
|                 | T>G                 | Thailand <sup>8</sup>                                                                                           | *R/S                                            | 4  |
| 94              | T>G                 | South Africa <sup>24</sup>                                                                                      | R                                               | 1  |
| 96 & 338        | C>T & G>T           | Russia <sup>42</sup>                                                                                            | R                                               | 3  |
| 96 & 338 & 362  | C>T & G>T & G>T     | Russia <sup>42</sup>                                                                                            | R                                               | 1  |
| 98              | A>C                 | China <sup>34</sup>                                                                                             | R                                               | 1  |
| 99              | C deletion          | Sweden <sup>38</sup>                                                                                            | R                                               | 1  |
| 100             | T>G                 | Japan <sup>14,16,46</sup> , Peru <sup>32</sup>                                                                  | R <sup>14,16,32,46</sup>                        | 6  |
| 100 & 400       | T>G & G>T           | Japan <sup>14</sup>                                                                                             | R                                               | 1  |
| 101             | A>G                 | Iran <sup>2</sup>                                                                                               | R                                               | 1  |
|                 | A>C                 | Thailand <sup>22</sup>                                                                                          | R                                               | 2  |
| 102             | C>A                 | Korea <sup>5</sup> , Japan <sup>14</sup>                                                                        | R <sup>5,14</sup>                               | 2  |
|                 | C>G                 | Netherlands <sup>41</sup>                                                                                       | R                                               | 1  |
|                 | 167-bp deletion     | Turkey <sup>27</sup>                                                                                            | R                                               | 3  |
| 103             | C deletion          | Spain <sup>59</sup>                                                                                             | R                                               | 1  |
| 104             | T>C                 | Thailand <sup>8</sup> , Japan <sup>46</sup> , Spain <sup>59</sup>                                               | R <sup>8,46,59</sup>                            | 4  |
|                 | T>G                 | Brazil <sup>23</sup>                                                                                            | R                                               | 1  |
| 106             | ~5.3 kb deletion    | USA <sup>33</sup>                                                                                               | R                                               | 1  |
| 107             | CG insertion        | South Africa <sup>21</sup>                                                                                      | R                                               | 1  |
| 108             | C>G                 | China <sup>47</sup>                                                                                             | R                                               | 1  |
| 109             | G>T                 | South Africa <sup>24</sup>                                                                                      | R                                               | 3  |
| 117 & 169       | G>A & C>G           | Sweden <sup>38</sup>                                                                                            | R                                               | 1  |
| 121             | T>C                 | China <sup>15</sup>                                                                                             | R                                               | 1  |
| 123             | C>G                 | China <sup>15</sup>                                                                                             | R                                               | 2  |
|                 | C>A                 | Thailand <sup>22</sup> , Peru <sup>32</sup>                                                                     | R <sup>22,32</sup>                              | 3  |
| 128             | A>C                 | Thailand <sup>22</sup> , Belgium <sup>43</sup>                                                                  | R <sup>22,43</sup>                              | 3  |
| 129 & 493       | 2-bp deletion & G>A | Japan <sup>14</sup>                                                                                             | R                                               | 1  |
| 132             | A insertion         | Korea <sup>1</sup>                                                                                              | R                                               | 1  |
| 134             | T>A                 | Korea <sup>1</sup>                                                                                              | R                                               | 2  |
|                 | T>G                 | Korea <sup>6</sup> , Taiwan <sup>18</sup>                                                                       | R <sup>6,18</sup>                               | 2  |
|                 | T>C                 | Thailand <sup>8</sup> , China <sup>34</sup>                                                                     | R <sup>8,34</sup>                               | 2  |
| 135             | G>C                 | Taiwan <sup>18</sup>                                                                                            | R                                               | 1  |
| 136             | G>C                 | South Africa <sup>24</sup> , Spain <sup>59</sup>                                                                | R <sup>24,59</sup>                              | 2  |
|                 | G>T                 | Thailand <sup>8</sup>                                                                                           | R                                               | 1  |
|                 | G insertion         | Yemen <sup>22</sup>                                                                                             | R                                               | 1  |
|                 | G deletion          | Brazil <sup>17</sup>                                                                                            | R                                               | 1  |
| 137             | C>A                 | Korea <sup>1,6,12</sup>                                                                                         | R <sup>1,6,12</sup>                             | 3  |
|                 | C>T                 | Portugal <sup>9</sup> , Canada <sup>12,64</sup> , USA <sup>12</sup> , Korea <sup>12</sup> , Yemen <sup>22</sup> | R <sup>9,12,22,64</sup>                         | 9  |
| 139             | A>C                 | China <sup>15</sup> , Korea <sup>20</sup>                                                                       | R <sup>15,20</sup>                              | 2  |
|                 | A>G                 | Korea <sup>6</sup> , Mexico <sup>26</sup> , China <sup>31</sup> , USA <sup>33,39</sup> , Sweden <sup>38</sup>   | R <sup>6,26,31,38,39</sup> , *R/S <sup>33</sup> | 12 |
|                 | A>T                 | Russia <sup>4</sup>                                                                                             | R                                               | 1  |
| 142             | A>G                 | Korea <sup>1</sup> , China <sup>47</sup>                                                                        | R <sup>1,47</sup>                               | 3  |
| 143             | A>C                 | Peru <sup>32</sup> , Cuba <sup>56</sup>                                                                         | R <sup>32,56</sup>                              | 5  |
| 145             | G>A                 | Korea <sup>20</sup> , Peru <sup>32</sup>                                                                        | R <sup>20,32</sup>                              | 28 |
|                 | G>C                 | South Africa <sup>24</sup>                                                                                      | R                                               | 1  |
|                 | G>T                 | China <sup>48</sup>                                                                                             | R                                               | 1  |
| 145 & 305       | G>C & C>T           | Mexico <sup>26</sup>                                                                                            | R                                               | 1  |
| 146             | A>T                 | Russia <sup>4</sup>                                                                                             | R                                               | 1  |
|                 | A>G                 | Russia <sup>4</sup> , Korea <sup>20</sup>                                                                       | R <sup>4,20</sup>                               | 2  |
|                 | A>C                 | Korea <sup>6,20</sup> , Brazil <sup>23</sup> , Belgium <sup>43</sup> , Japan <sup>46</sup>                      | R <sup>6,20,43,46</sup> , *R/S <sup>23</sup>    | 8  |

|           |                   |                                                                                                                                                                             |                                               |    |
|-----------|-------------------|-----------------------------------------------------------------------------------------------------------------------------------------------------------------------------|-----------------------------------------------|----|
| 150       | 80-bp deletion    | Korea <sup>20</sup>                                                                                                                                                         | R                                             | 1  |
| 151       | C>G               | China <sup>51</sup>                                                                                                                                                         | R                                             | 1  |
|           | C>A               | Brazil <sup>17</sup>                                                                                                                                                        | R                                             | 1  |
|           | C>T               | Scotland <sup>10</sup>                                                                                                                                                      | R                                             | 1  |
|           | 80-bp deletion    | Korea <sup>6</sup>                                                                                                                                                          | R                                             | 1  |
| 152       | A>C               | Portugal <sup>9</sup> , Korea <sup>20</sup> , Thailand <sup>22</sup> , Turkey <sup>27</sup> , USA <sup>33</sup> , Japan <sup>46</sup> , China <sup>47</sup>                 | R <sup>9,20,22,27,33,46,47</sup>              | 10 |
|           | A>G               | Brazil <sup>11</sup> , Thailand <sup>22</sup> , Peru <sup>32</sup> , Italy <sup>40</sup> , India <sup>50</sup> , Canada <sup>64</sup>                                       | R <sup>11,22,32,40,50,64</sup>                | 21 |
| 153       | C>A               | Japan <sup>19</sup> , Sweden <sup>38</sup> , USA <sup>39</sup> , Poland <sup>66</sup>                                                                                       | R <sup>19,38,39,66</sup>                      | 6  |
|           | C>G               | Poland <sup>19,66</sup> , India <sup>58</sup> , Sweden <sup>61</sup>                                                                                                        | R <sup>19,58,61,66</sup>                      | 7  |
| 153 & 493 | C>A & G>A         | Japan <sup>14</sup>                                                                                                                                                         | R                                             | 1  |
| 156 & 546 | C>A & G>T         | India <sup>50</sup>                                                                                                                                                         | R                                             | 1  |
| 157       | G>A               | Japan <sup>19</sup>                                                                                                                                                         | R                                             | 1  |
| 158       | A>C               | Korea <sup>12</sup>                                                                                                                                                         | R                                             | 1  |
|           | 44-bp deletion    | China <sup>47</sup>                                                                                                                                                         | R                                             | 1  |
|           | A deletion        | Korea <sup>6</sup>                                                                                                                                                          | R                                             | 1  |
| 160       | C>A               | China <sup>15</sup>                                                                                                                                                         | R                                             | 1  |
|           | C>T               | Sweden <sup>38,61</sup>                                                                                                                                                     | R <sup>38,61</sup>                            | 2  |
| 161       | C>G               | Japan <sup>16</sup> , Canada <sup>64</sup>                                                                                                                                  | R <sup>16,64</sup>                            | 2  |
|           | C>T               | Japan <sup>14,19</sup> , Taiwan <sup>18</sup> , South Africa <sup>21,24</sup> , China <sup>34,47</sup> , Peru <sup>32</sup> , Sweden <sup>38,61</sup> , Spain <sup>59</sup> | R <sup>14,18,19,21,24,32,34,38,47,59,61</sup> | 15 |
|           | C>A               | Brazil <sup>11</sup> , Korea <sup>20</sup> , China <sup>34</sup>                                                                                                            | R <sup>11,20,34</sup>                         | 3  |
|           | C deletion        | Korea <sup>6</sup>                                                                                                                                                          | R                                             | 1  |
| 161 & 225 | C>T & T>C         | Mexico <sup>26</sup>                                                                                                                                                        | R                                             | 1  |
| 165       | T>A               | Taiwan <sup>18</sup>                                                                                                                                                        | R                                             | 1  |
| 166       | G>T               | Taiwan <sup>18</sup>                                                                                                                                                        | R                                             | 1  |
| 167       | A>G               | Taiwan <sup>18</sup>                                                                                                                                                        | R                                             | 1  |
| 168       | C insertion       | Taiwan <sup>18</sup>                                                                                                                                                        | R                                             | 1  |
| 169       | C>G               | Iran <sup>2</sup> , Korea <sup>6</sup> , Sweden <sup>38,57</sup> , USA <sup>39,55</sup> , New Zealand <sup>45</sup> , Japan <sup>46</sup> , Canada <sup>64</sup>            | R <sup>2,6,38,39,45,46,55,57,64</sup>         | 21 |
|           | C>T               | South Africa <sup>24</sup> , China <sup>31,48</sup> , Netherlands <sup>41</sup>                                                                                             | R <sup>24,31,41,48</sup>                      | 7  |
| 169 & 222 | C>G & C>T         | Canada <sup>64</sup>                                                                                                                                                        | R                                             | 1  |
| 170       | A>C               | Taiwan <sup>18</sup> , China <sup>34</sup> , Turkey <sup>44</sup> , Japan <sup>46</sup>                                                                                     | R <sup>18,34,44,46</sup>                      | 4  |
|           | A>G               | Korea <sup>5</sup> , Brazil <sup>11</sup> , Canada <sup>64</sup>                                                                                                            | R <sup>5,11,64</sup>                          | 3  |
|           | T insertion       | China <sup>34</sup>                                                                                                                                                         | R                                             | 1  |
| 171       | C>T               | Taiwan <sup>18</sup>                                                                                                                                                        | R                                             | 1  |
| 172       | T>C               | Korea <sup>6,7</sup> , Peru <sup>13</sup> , Sweden <sup>38,61</sup>                                                                                                         | R <sup>6,7,13,38,61</sup>                     | 6  |
|           | T deletion        | South Africa <sup>24</sup>                                                                                                                                                  | R                                             | 12 |
|           | 2-bp deletion     | Brazil <sup>23</sup>                                                                                                                                                        | R                                             | 1  |
| 173       | T>C               | China <sup>31,47</sup>                                                                                                                                                      | R <sup>31,47</sup>                            | 2  |
| 174       | C>A               | Taiwan <sup>18</sup> , South Africa <sup>30</sup>                                                                                                                           | R <sup>18,30</sup>                            | 2  |
|           | C>G               | Korea <sup>20</sup> , Canada <sup>22,64</sup> , Sweden <sup>38</sup>                                                                                                        | R <sup>20,22,38,64</sup>                      | 4  |
|           | T insertion       | China <sup>34</sup>                                                                                                                                                         | R                                             | 1  |
| 175       | T>C               | South Africa <sup>3</sup> , Brazil <sup>11,49</sup> , Japan <sup>14</sup> , Korea <sup>20</sup> , Turkey <sup>44</sup>                                                      | R <sup>3,11,14,20,44,49</sup>                 | 6  |
| 180 & 425 | C>T & C>T         | Korea <sup>7</sup>                                                                                                                                                          | R                                             | 1  |
| 181       | A>C               | France <sup>37</sup>                                                                                                                                                        | R                                             | 1  |
| 181 & 416 | A>C & T>C         | Japan <sup>46</sup>                                                                                                                                                         | R                                             | 1  |
| 182       | 5-bp insertion    | Brazil <sup>17</sup>                                                                                                                                                        | R                                             | 3  |
|           | CA deletion       | Japan <sup>46</sup>                                                                                                                                                         | R                                             | 1  |
| 184       | C>A               | Latvia <sup>25</sup> , New Zealand <sup>45</sup> , China <sup>47</sup>                                                                                                      | R <sup>25,45,47</sup>                         | 3  |
| 184 & 290 | T insertion & G>T | Japan <sup>46</sup>                                                                                                                                                         | R                                             | 1  |
| 185       | C>T               | Japan <sup>16</sup> , Korea <sup>20</sup> , Peru <sup>32</sup> , China <sup>63</sup>                                                                                        | R <sup>16,20,32,63</sup>                      | 5  |
|           | C>A               | Azerbaijan <sup>10</sup> , Taiwan <sup>18</sup> , Poland <sup>66</sup>                                                                                                      | R <sup>10,18,66</sup>                         | 3  |
|           | C>G               | USA <sup>33</sup>                                                                                                                                                           | R                                             | 1  |
| 188       | A>G               | Yemen <sup>22</sup> , Latvia <sup>25</sup> , Belgium <sup>43</sup> , Canada <sup>64</sup>                                                                                   | R <sup>22,25,43,64</sup>                      | 5  |
|           | A>C               | Mexico <sup>26</sup> , Belgium <sup>43</sup>                                                                                                                                | R <sup>26,43,62</sup>                         | 3  |

|                 |                                |                                                                                                                                                |                                           |    |
|-----------------|--------------------------------|------------------------------------------------------------------------------------------------------------------------------------------------|-------------------------------------------|----|
|                 |                                | Singapore <sup>62</sup>                                                                                                                        |                                           |    |
|                 | 2-bp insertion                 | Japan <sup>16</sup> , Peru <sup>32</sup>                                                                                                       | R <sup>16,32</sup>                        | 2  |
|                 | T insertion                    | New Zealand <sup>45</sup>                                                                                                                      | R                                         | 1  |
| 190             | T>G                            | Korea <sup>6,7</sup>                                                                                                                           | R <sup>6,7</sup>                          | 2  |
| 192             | 8-bp insertion                 | Brazil <sup>123</sup>                                                                                                                          | R                                         | 3  |
|                 | A insertion                    | France <sup>37</sup> , China <sup>48</sup>                                                                                                     | R <sup>37,48</sup>                        | 2  |
| 193             | A insertion                    | Portugal <sup>9</sup> , Canada <sup>12</sup> , USA <sup>12</sup>                                                                               | R <sup>9,12</sup>                         | 3  |
| 194 & 244       | C>G & C>T                      | Turkey <sup>44</sup>                                                                                                                           | R                                         | 1  |
| 195             | C>T                            | Iran <sup>2</sup> , India <sup>50</sup> , USA <sup>39</sup> , Sweden <sup>61</sup>                                                             | R <sup>2,39</sup> , *R/S <sup>50,61</sup> | 19 |
|                 | 68-bp deletion                 | Azerbaijan <sup>10</sup>                                                                                                                       | R                                         | 1  |
| 195 & -11       | C>T & A>G                      | India <sup>50</sup>                                                                                                                            | R                                         | 1  |
| 195 & 11        | C>T & T>G                      | Canada <sup>64</sup>                                                                                                                           | R                                         | 1  |
| 195 & 29        | C>T & A>G                      | India <sup>50</sup>                                                                                                                            | R                                         | 1  |
| 195 & 43        | C>T & T deletion               | Iran <sup>2</sup>                                                                                                                              | R                                         | 1  |
| 195 & 131       | C>T & T>G                      | Iran <sup>2</sup>                                                                                                                              | R                                         | 1  |
| 195 & 182 & 226 | C>T & A insertion & A deletion | Korea <sup>1</sup>                                                                                                                             | R                                         | 1  |
| 195 & 202       | C>T & T>C                      | USA <sup>39</sup>                                                                                                                              | R                                         | 1  |
| 195 & 282       | C>T & 2-bp deletion            | Canada <sup>64</sup>                                                                                                                           | R                                         | 1  |
| 195 & 314       | C>T & G>A                      | India <sup>50</sup>                                                                                                                            | R                                         | 1  |
| 195 & 328       | C>T & G>T                      | India <sup>50</sup>                                                                                                                            | R                                         | 1  |
| 195 & 329       | C>T & A deletion               | Thailand <sup>65</sup>                                                                                                                         | R                                         | 1  |
| 195 & 391       | C>T & G insertion              | Canada <sup>64</sup>                                                                                                                           | R                                         | 1  |
| 195 & 406       | C>T & G>A                      | India <sup>50</sup>                                                                                                                            | R                                         | 1  |
| 195 & 408       | C>T & G insertion              | Canada <sup>64</sup>                                                                                                                           | R                                         | 1  |
| 195 & 422       | C>T & A>C                      | Canada <sup>64</sup>                                                                                                                           | R                                         | 1  |
| 195 & 515       | C>T & T>C                      | India <sup>50</sup>                                                                                                                            | R                                         | 1  |
| 195 & 528       | C>T & GC insertion             | Sweden <sup>38</sup>                                                                                                                           | R                                         | 1  |
| 195 & 535       | C>T & A>C                      | Iran <sup>2</sup>                                                                                                                              | R                                         | 1  |
| 195 & 535       | C>T & A deletion               | India <sup>50</sup>                                                                                                                            | R                                         | 1  |
| 196             | T>C                            | Korea <sup>1</sup> , Russia <sup>4</sup> , China <sup>31</sup>                                                                                 | R <sup>1,4,31</sup>                       | 3  |
|                 | 14-bp insertion                | Korea <sup>20</sup>                                                                                                                            | R                                         | 1  |
| 199             | T>C                            | Korea <sup>6</sup> , Thailand <sup>8</sup> , Canada <sup>22</sup> , Sweden <sup>38</sup> , China <sup>47,48</sup> , Canada <sup>64</sup>       | R <sup>6,8,22,38,47,48,64</sup>           | 7  |
| 200             | 8-bp insertion                 | India <sup>50</sup>                                                                                                                            | R                                         | 1  |
| 200 & 390       | C>T & GG insertion             | Thailand <sup>65</sup>                                                                                                                         | R                                         | 1  |
| 202             | T>C                            | Korea <sup>1,6</sup> , Brazil <sup>17</sup> , South Africa <sup>24</sup> , Sweden <sup>38</sup> , China <sup>47,48</sup>                       | R <sup>1,6,17,24,38,47,48</sup>           | 11 |
|                 | T>G                            | Korea <sup>6</sup> , South Africa <sup>24</sup> , Mexico <sup>26</sup> , Poland <sup>66</sup>                                                  | R <sup>6,24,26,66</sup>                   | 10 |
| 203             | G>T                            | Brazil <sup>11</sup> , Hong Kong <sup>28</sup> , Spain <sup>59</sup>                                                                           | R <sup>11,28,59</sup>                     | 5  |
|                 | G>C                            | Korea <sup>1,6</sup>                                                                                                                           | R <sup>1,6</sup>                          | 2  |
|                 | G>A                            | Korea <sup>6,20</sup> , USA <sup>12</sup>                                                                                                      | R <sup>6,12,20</sup>                      | 4  |
| 205             | C>G                            | Brazil <sup>23</sup>                                                                                                                           | R                                         | 1  |
| 206             | C>G                            | Korea <sup>20</sup> , India <sup>58</sup>                                                                                                      | R <sup>20,58</sup>                        | 4  |
|                 | C>T                            | France <sup>37</sup>                                                                                                                           | R                                         | 1  |
| 207             | ACC deletion                   | Taiwan <sup>18</sup>                                                                                                                           | R                                         | 1  |
| 211             | C>T                            | South Africa <sup>3,24</sup> , Taiwan <sup>18</sup> , Mexico <sup>26</sup> , Peru <sup>32</sup> , Belgium <sup>43</sup> , Canada <sup>64</sup> | R <sup>3,18,24,26,32,43,64</sup>          | 8  |
|                 | C>G                            | Thailand <sup>8</sup>                                                                                                                          | R                                         | 8  |
|                 | C>A                            | China <sup>34</sup> , Belgium <sup>43</sup>                                                                                                    | R <sup>34,43</sup>                        | 2  |
|                 | 3-bp deletion                  | Korea <sup>20</sup>                                                                                                                            | R                                         | 1  |
| 212             | A>G                            | Iran <sup>2</sup> , Korea <sup>1</sup> , Portugal <sup>9</sup> , USA <sup>33</sup>                                                             | R <sup>2,7,9,33</sup>                     | 6  |
|                 | A>C                            | Japan <sup>46</sup>                                                                                                                            | R                                         | 1  |
|                 | 14-bp insertion                | Korea <sup>20</sup>                                                                                                                            | R                                         | 1  |

|           |                              |                                                                                                                                                                                                                                                                                                                                                                           |                                                                           |    |
|-----------|------------------------------|---------------------------------------------------------------------------------------------------------------------------------------------------------------------------------------------------------------------------------------------------------------------------------------------------------------------------------------------------------------------------|---------------------------------------------------------------------------|----|
| 213       | T>A                          | Korea <sup>1</sup> , Netherlands <sup>41</sup>                                                                                                                                                                                                                                                                                                                            | R <sup>1,41</sup>                                                         | 3  |
|           | T>G                          | USA <sup>12</sup>                                                                                                                                                                                                                                                                                                                                                         | R                                                                         | 1  |
|           | T deletion                   | Brazil <sup>17</sup>                                                                                                                                                                                                                                                                                                                                                      | R                                                                         | 1  |
| 214       | T>C                          | China <sup>15</sup> , Thailand <sup>22</sup> , Brazil <sup>23</sup> , India <sup>58</sup>                                                                                                                                                                                                                                                                                 | R <sup>15,22,23,58</sup>                                                  | 6  |
| 215       | G>A                          | Thailand <sup>8</sup> , Brazil <sup>23</sup> , South Africa <sup>24</sup>                                                                                                                                                                                                                                                                                                 | R <sup>8,23,24</sup>                                                      | 3  |
|           | 29-bp deletion               | France <sup>37</sup>                                                                                                                                                                                                                                                                                                                                                      | R                                                                         | 1  |
| 216       | C>A                          | Korea <sup>20</sup> , China <sup>47</sup>                                                                                                                                                                                                                                                                                                                                 | R <sup>20,47</sup>                                                        | 2  |
|           | C>G                          | Japan <sup>19</sup> , Latvia <sup>25</sup> , Canada <sup>64</sup>                                                                                                                                                                                                                                                                                                         | R <sup>19,25,64</sup>                                                     | 4  |
| 218       | G insertion                  | Netherlands <sup>41</sup>                                                                                                                                                                                                                                                                                                                                                 | R                                                                         | 1  |
| 221       | G insertion                  | Scotland <sup>10</sup>                                                                                                                                                                                                                                                                                                                                                    | R                                                                         | 2  |
| 222       | G>C                          | Thailand <sup>8</sup>                                                                                                                                                                                                                                                                                                                                                     | R                                                                         | 1  |
| 223       | T>C                          | South Africa <sup>21</sup>                                                                                                                                                                                                                                                                                                                                                | R                                                                         | 1  |
| 225 & 515 | T>C & T>C                    | Mexico <sup>26</sup>                                                                                                                                                                                                                                                                                                                                                      | R                                                                         | 1  |
| 226       | A>C                          | Korea <sup>1,6,20</sup> , Brazil <sup>17,23</sup> , South Africa <sup>21</sup> , Myanmar <sup>22</sup> , Latvia <sup>25</sup> , Mexico <sup>26</sup> , China <sup>31,34,47,63</sup> , Peru <sup>32</sup> , USA <sup>33</sup> , Portugal <sup>35</sup> , Netherlands <sup>41</sup> , India <sup>50</sup> , Cuba <sup>56</sup> , Spain <sup>59</sup> , Canada <sup>64</sup> | R <sup>1,6,17,20,21,22,23,25,26,31,32,33,34,35,41,47,50,56,59,63,64</sup> | 38 |
|           | A>G                          | Taiwan <sup>18</sup>                                                                                                                                                                                                                                                                                                                                                      | R                                                                         | 1  |
| 227       | C>T                          | Korea <sup>6,7</sup> , Brazil <sup>23</sup> , Turkey <sup>44</sup>                                                                                                                                                                                                                                                                                                        | R <sup>6,7,23,44</sup>                                                    | 4  |
| 232       | G>A                          | Korea <sup>5</sup>                                                                                                                                                                                                                                                                                                                                                        | R                                                                         | 1  |
|           | G>T                          | Peru <sup>32</sup>                                                                                                                                                                                                                                                                                                                                                        | R                                                                         | 1  |
| 233       | G>T                          | Taiwan <sup>18</sup>                                                                                                                                                                                                                                                                                                                                                      | R                                                                         | 1  |
|           | G>A                          | Korea <sup>6</sup> , USA <sup>33</sup>                                                                                                                                                                                                                                                                                                                                    | R <sup>6,33</sup>                                                         | 2  |
|           | G insertion                  | USA <sup>39</sup>                                                                                                                                                                                                                                                                                                                                                         | R                                                                         | 1  |
| 233-237   | GCGCG-ACGTCTCCA substitution | Korea <sup>20</sup>                                                                                                                                                                                                                                                                                                                                                       | R                                                                         | 1  |
| 234       | G insertion                  | China <sup>34</sup>                                                                                                                                                                                                                                                                                                                                                       | R                                                                         | 1  |
|           | 4-bp insertion               | Korea <sup>5</sup>                                                                                                                                                                                                                                                                                                                                                        | R                                                                         | 1  |
| 236 & 360 | C>T & T insertion            | South Africa <sup>3</sup>                                                                                                                                                                                                                                                                                                                                                 | R                                                                         | 1  |
| 239       | A deletion                   | Turkey <sup>44</sup>                                                                                                                                                                                                                                                                                                                                                      | R                                                                         | 1  |
| 241       | T>G                          | China <sup>31,63</sup>                                                                                                                                                                                                                                                                                                                                                    | R <sup>31,63</sup>                                                        | 3  |
| 244       | C>G                          | Belgium <sup>43</sup>                                                                                                                                                                                                                                                                                                                                                     | R                                                                         | 1  |
| 245       | A>G                          | USA <sup>12</sup> , Brazil <sup>17</sup> , China <sup>34,63</sup> , Belgium <sup>43</sup> , New Zealand <sup>45</sup>                                                                                                                                                                                                                                                     | R <sup>12,17,43,45,63</sup> , *R/S <sup>34</sup>                          | 7  |
|           | AT>GG                        | China <sup>31</sup>                                                                                                                                                                                                                                                                                                                                                       | R                                                                         | 1  |
| 245 & 389 | A>G & T>C                    | Korea <sup>20</sup>                                                                                                                                                                                                                                                                                                                                                       | R                                                                         | 1  |
| 246       | A>T                          | Brazil <sup>17</sup>                                                                                                                                                                                                                                                                                                                                                      | R                                                                         | 1  |
| 248       | C>G                          | Taiwan <sup>18</sup>                                                                                                                                                                                                                                                                                                                                                      | R                                                                         | 1  |
| 249       | T>G                          | China <sup>34</sup>                                                                                                                                                                                                                                                                                                                                                       | R                                                                         | 1  |
| 250       | C insertion                  | Portugal <sup>9,35</sup>                                                                                                                                                                                                                                                                                                                                                  | R <sup>9,35</sup>                                                         | 7  |
| 254       | T>C                          | Iran <sup>2</sup> , Korea <sup>6</sup> , China <sup>15</sup> , Taiwan <sup>18</sup> , Peru <sup>32</sup> , USA <sup>33,39</sup> , India <sup>58</sup>                                                                                                                                                                                                                     | R <sup>2,6,15,18,32,33,39,58</sup>                                        | 15 |
|           | T>G                          | Korea <sup>6,12</sup> , Azerbaijan <sup>10</sup> , China <sup>15</sup> , Japan <sup>16</sup> , Latvia <sup>25</sup>                                                                                                                                                                                                                                                       | R <sup>6,10,12,15,16,25</sup>                                             | 7  |
|           | T>A                          | Canada <sup>64</sup>                                                                                                                                                                                                                                                                                                                                                      | R                                                                         | 2  |
| 258       | 18-bp insertion              | Peru <sup>32</sup>                                                                                                                                                                                                                                                                                                                                                        | R                                                                         | 1  |
| 260       | C>T                          | Belgium <sup>43</sup>                                                                                                                                                                                                                                                                                                                                                     | R                                                                         | 2  |
|           | C deletion                   | Canada <sup>64</sup>                                                                                                                                                                                                                                                                                                                                                      | R                                                                         | 1  |
|           | AC insertion                 | Japan <sup>46</sup>                                                                                                                                                                                                                                                                                                                                                       | R                                                                         | 1  |
| 260 & 436 | C>T & G deletion             | France <sup>37</sup>                                                                                                                                                                                                                                                                                                                                                      | R                                                                         | 1  |
| 261       | 2-bp insertion               | Japan <sup>14,16</sup>                                                                                                                                                                                                                                                                                                                                                    | R <sup>14,16</sup>                                                        | 4  |
| 263       | C>A                          | China <sup>15</sup> , Canada <sup>64</sup>                                                                                                                                                                                                                                                                                                                                | R <sup>15,64</sup>                                                        | 2  |
| 264       | 24-bp deletion               | USA <sup>55</sup>                                                                                                                                                                                                                                                                                                                                                         | R                                                                         | 1  |
| 269       | T>G                          | South Africa <sup>24</sup> , Sweden <sup>38</sup> , USA <sup>55</sup> , Canada <sup>64</sup> , Thailand <sup>65</sup>                                                                                                                                                                                                                                                     | R <sup>24,38,55,64,65</sup>                                               | 5  |
| 279       | 106-bp insertion             | Peru <sup>32</sup>                                                                                                                                                                                                                                                                                                                                                        | R                                                                         | 1  |
| 280       | T>C                          | China <sup>31</sup> , Peru <sup>32</sup>                                                                                                                                                                                                                                                                                                                                  | R <sup>31,32</sup>                                                        | 4  |
| 281       | T>C                          | Mexico <sup>26</sup> , China <sup>31</sup>                                                                                                                                                                                                                                                                                                                                | R <sup>26,31</sup>                                                        | 2  |
|           | T>G                          | Cuba <sup>56</sup>                                                                                                                                                                                                                                                                                                                                                        | R                                                                         | 1  |
| 282       | C>G                          | Korea <sup>1</sup> , Thailand <sup>65</sup>                                                                                                                                                                                                                                                                                                                               | R <sup>1,65</sup>                                                         | 2  |
|           | T insertion                  | Portugal <sup>35</sup>                                                                                                                                                                                                                                                                                                                                                    | R                                                                         | 1  |
| 285       | C>A                          | Portugal <sup>35</sup>                                                                                                                                                                                                                                                                                                                                                    | R                                                                         | 1  |

|              |                  |                                                                                                                                                                                 |                                     |    |
|--------------|------------------|---------------------------------------------------------------------------------------------------------------------------------------------------------------------------------|-------------------------------------|----|
|              | CA deletion      | Peru <sup>32</sup>                                                                                                                                                              | R                                   | 2  |
| 286          | A>G              | Russia <sup>4</sup> , Korea <sup>6,20</sup> , Portugal <sup>9</sup> ,<br>China <sup>31</sup> , India <sup>50</sup>                                                              | R <sup>4,6,9,20,31,50</sup>         | 14 |
|              | A>C              | Korea <sup>6</sup>                                                                                                                                                              | R                                   | 1  |
|              | A>T              | South Africa <sup>3</sup>                                                                                                                                                       | R                                   | 1  |
|              | A deletion       | Korea <sup>20</sup>                                                                                                                                                             | R                                   | 2  |
| 287          | A>C              | Brazil <sup>11,49</sup> , Korea <sup>20</sup> , China <sup>34</sup> ,<br>France <sup>37</sup>                                                                                   | R <sup>11,20,34,37,49</sup>         | 7  |
|              | A>G              | Mexico <sup>26</sup>                                                                                                                                                            | R                                   | 1  |
|              | A>T              | Italy <sup>40</sup>                                                                                                                                                             | R                                   | 1  |
|              | T insertion      | Korea <sup>6</sup> , Canada <sup>22</sup>                                                                                                                                       | R <sup>6,22</sup>                   | 2  |
| 288          | G>T              | China <sup>15</sup>                                                                                                                                                             | R                                   | 2  |
|              | G>C              | India <sup>58</sup>                                                                                                                                                             | R                                   | 37 |
|              | G deletion       | USA <sup>39</sup>                                                                                                                                                               | R                                   | 1  |
| 289          | G>T              | South Africa <sup>3,21</sup> , Italy <sup>40</sup> , India <sup>50</sup>                                                                                                        | R <sup>3,21,40,50</sup>             | 6  |
|              | G>A              | Thailand <sup>8</sup> , USA <sup>12,33</sup> , Korea <sup>20</sup> ,<br>China <sup>34</sup>                                                                                     | R <sup>8,12,20,33,34</sup>          | 8  |
|              | G>C              | Netherlands <sup>41</sup>                                                                                                                                                       | R                                   | 1  |
| 290          | G>A              | South Africa <sup>3</sup> , Japan <sup>16</sup> ,<br>Taiwan <sup>18,29</sup> , USA <sup>33</sup> , China <sup>34</sup> ,<br>New Zealand <sup>45</sup> , Singapore <sup>62</sup> | R <sup>3,16,18,29,33,34,45,62</sup> | 8  |
|              | T insertion      | Portugal <sup>9</sup>                                                                                                                                                           | R                                   | 1  |
| 291          | T>C              | Sweden <sup>57</sup>                                                                                                                                                            | R                                   | 2  |
|              | T deletion       | Italy <sup>40</sup>                                                                                                                                                             | R                                   | 1  |
| 292          | G insertion      | Poland <sup>166</sup>                                                                                                                                                           | R                                   | 1  |
| 293          | 10-bp deletion   | Peru <sup>32</sup>                                                                                                                                                              | R                                   | 1  |
| 297          | C>G              | Brazil <sup>17</sup> , USA <sup>33</sup>                                                                                                                                        | R <sup>17,33</sup>                  | 2  |
|              | C>A              | Thailand <sup>22</sup> , Japan <sup>46</sup>                                                                                                                                    | R <sup>22,46</sup>                  | 2  |
| 298          | A>C              | China <sup>34</sup>                                                                                                                                                             | R                                   | 4  |
|              | A>G              | Taiwan <sup>18</sup>                                                                                                                                                            | R                                   | 1  |
| 300 &<br>539 | C deletion & T>C | Singapore <sup>62</sup>                                                                                                                                                         | R                                   | 1  |
| 301          | G deletion       | Korea <sup>12</sup>                                                                                                                                                             | R                                   | 1  |
|              | A insertion      | China <sup>15</sup>                                                                                                                                                             | R                                   | 1  |
| 303          | A deletion       | Korea <sup>20</sup>                                                                                                                                                             | R                                   | 1  |
| 304          | G>A              | Russia <sup>4</sup>                                                                                                                                                             | R                                   | 1  |
| 305          | C>T              | South Africa <sup>3,60</sup> , Russia <sup>4</sup> , China <sup>34</sup>                                                                                                        | R <sup>3,4,34,60</sup>              | 8  |
| 306          | C insertion      | France <sup>37</sup>                                                                                                                                                            | R                                   | 1  |
| 307          | T>G              | Canada <sup>64</sup>                                                                                                                                                            | R                                   | 1  |
|              | T>C              | Korea <sup>6</sup> , Canada <sup>10</sup> , Latvia <sup>25</sup> ,<br>Sweden <sup>38</sup>                                                                                      | R <sup>6,10,25,38</sup>             | 10 |
|              | 5-bp deletion    | Korea <sup>6</sup>                                                                                                                                                              | R                                   | 1  |
| 308          | A>T              | Latvia <sup>25</sup>                                                                                                                                                            | R                                   | 1  |
|              | A>G              | Taiwan <sup>18</sup> , China <sup>34</sup> , France <sup>37</sup> ,<br>Poland <sup>166</sup>                                                                                    | R <sup>18,34,37,66</sup>            | 4  |
|              | A>C              | Korea <sup>6</sup>                                                                                                                                                              | R                                   | 2  |
| 309          | C>G              | Russia <sup>4</sup> , Korea <sup>6</sup> , Brazil <sup>17</sup> , South<br>Africa <sup>24</sup> , Peru <sup>32</sup> , USA <sup>33</sup>                                        | R <sup>4,6,17,24,32,33</sup>        | 15 |
|              | C>A              | Korea <sup>1</sup> , USA <sup>33</sup> , Cuba <sup>56</sup>                                                                                                                     | R <sup>1,33,56</sup>                | 4  |
| 310          | A>T              | USA <sup>35</sup>                                                                                                                                                               | R                                   | 1  |
| 312          | C>A              | Korea <sup>1,20</sup>                                                                                                                                                           | R <sup>1,20</sup>                   | 2  |
|              | C>G              | Thailand <sup>8,65</sup> , Yemen <sup>22</sup>                                                                                                                                  | R <sup>8,22,65</sup>                | 4  |
| 314          | G>A              | Brazil <sup>11</sup> , Peru <sup>32</sup> , China <sup>34</sup>                                                                                                                 | R <sup>11,32,34</sup>               | 4  |
|              | C insertion      | Brazil <sup>11</sup>                                                                                                                                                            | R                                   | 2  |
| 315          | G insertion      | South Africa <sup>3</sup> , Brazil <sup>17</sup> , China <sup>34</sup>                                                                                                          | R <sup>3,17,34</sup>                | 4  |
| 316          | 245-bp deletion  | Poland <sup>66</sup>                                                                                                                                                            | R                                   | 1  |
| 317          | CT insertion     | Korea <sup>7</sup>                                                                                                                                                              | R                                   | 1  |
| 319          | G>A              | South Africa <sup>24</sup>                                                                                                                                                      | R                                   | 1  |
|              | G>T              | Taiwan <sup>18</sup>                                                                                                                                                            | R                                   | 1  |
| 322          | G>T              | Iran <sup>2</sup>                                                                                                                                                               | R                                   | 1  |
|              | G>C              | Iran <sup>2</sup> , Brazil <sup>11</sup> , Korea <sup>20</sup>                                                                                                                  | R <sup>2,11,20</sup>                | 4  |
| 334          | A>T              | China <sup>34</sup>                                                                                                                                                             | R                                   | 1  |
| 335          | A>T              | Taiwan <sup>18</sup>                                                                                                                                                            | R                                   | 2  |
| 337          | G deletion       | Korea <sup>20</sup>                                                                                                                                                             | R                                   | 1  |
| 338 &<br>472 | G>A & G>A        | Korea <sup>5</sup>                                                                                                                                                              | R                                   | 1  |
| 339          | G insertion      | Canada <sup>64</sup>                                                                                                                                                            | R                                   | 1  |
| 340          | A>C              | Yemen <sup>22</sup> , South Africa <sup>24</sup> ,<br>Poland <sup>66</sup>                                                                                                      | R <sup>22,24,66</sup>               | 4  |
| 341          | C deletion       | Korea <sup>6,12</sup>                                                                                                                                                           | R <sup>6,12</sup>                   | 2  |
|              | 1355-bp deletion | France <sup>37</sup>                                                                                                                                                            | R                                   | 1  |
| 346          | C>G              | South Africa <sup>24</sup>                                                                                                                                                      | R                                   | 1  |

|              |                    |                                                                                                                                            |                                         |    |
|--------------|--------------------|--------------------------------------------------------------------------------------------------------------------------------------------|-----------------------------------------|----|
| 347          | T>G                | Korea <sup>1</sup> , Russia <sup>4</sup> , India <sup>50</sup> , Poland <sup>66</sup>                                                      | R <sup>1,4,50,66</sup>                  | 11 |
|              | T>C                | Peru <sup>32</sup> , Italy <sup>40</sup> , China <sup>63</sup>                                                                             | R <sup>32,40</sup> , *R/S <sup>63</sup> | 4  |
| 350          | T insertion        | Japan <sup>46</sup>                                                                                                                        | R                                       | 1  |
| 352          | 7-bp deletion      | Taiwan <sup>29</sup>                                                                                                                       | R                                       | 1  |
| 353          | A>C                | China <sup>15</sup>                                                                                                                        | R                                       | 1  |
| 355          | T>A                | China <sup>34</sup>                                                                                                                        | R                                       | 2  |
| 356          | G>T                | Peru <sup>32</sup>                                                                                                                         | R                                       | 1  |
| 357          | G>A                | Korea <sup>6</sup> , Cuba <sup>56</sup>                                                                                                    | R <sup>6,56</sup>                       | 2  |
| 359          | T>G                | Iran <sup>2</sup> , Brazil <sup>11,49</sup> , New Zealand <sup>45</sup> ,<br>India <sup>50</sup> , Spain <sup>59</sup>                     | R <sup>2,11,45,49,50,59</sup>           | 6  |
|              | T>C                | Portugal <sup>9,35</sup> , Mexico <sup>26</sup> , Sweden <sup>57</sup>                                                                     | R <sup>9,26,35,57</sup>                 | 29 |
|              | 81-bp deletion     | Peru <sup>32</sup>                                                                                                                         | R                                       | 2  |
| 359 &<br>435 | T>G & G insertion  | Korea <sup>1</sup>                                                                                                                         | R                                       | 1  |
| 361          | C deletion         | Spain <sup>59</sup>                                                                                                                        | R                                       | 1  |
| 362          | G>C                | Korea <sup>6</sup> , China <sup>15,48</sup>                                                                                                | R <sup>6,15,48</sup>                    | 3  |
|              | G>A                | Thailand <sup>8</sup>                                                                                                                      | R                                       | 1  |
| 364          | C>T                | Taiwan <sup>18</sup> , South Africa <sup>21,60</sup> ,<br>Peru <sup>32</sup>                                                               | R <sup>18,21,32,60</sup>                | 4  |
| 368          | G>C                | Sweden <sup>38,57,61</sup>                                                                                                                 | R <sup>38,57,61</sup>                   | 3  |
|              | G>T                | South Africa <sup>21</sup>                                                                                                                 | R                                       | 1  |
|              | 18-bp insertion    | Korea <sup>6</sup>                                                                                                                         | R                                       | 1  |
|              | AG insertion       | China <sup>15</sup>                                                                                                                        | R                                       | 1  |
| 373          | G>T                | Thailand <sup>8</sup> , Sweden <sup>38,61</sup> ,<br>New Zealand <sup>45</sup>                                                             | R <sup>8,38,45,61</sup>                 | 4  |
|              | 9-bp insertion     | Korea <sup>20</sup>                                                                                                                        | R                                       | 1  |
| 374          | T>G                | Portugal <sup>9,35</sup> , Mexico <sup>26</sup>                                                                                            | R <sup>9,26,35</sup>                    | 28 |
|              | T>A                | Russia <sup>4</sup> , Sweden <sup>38</sup>                                                                                                 | R <sup>4,38</sup>                       | 3  |
|              | 16-bp deletion     | Japan <sup>14</sup>                                                                                                                        | R                                       | 1  |
| 375          | C insertion        | Mexico <sup>26</sup>                                                                                                                       | R                                       | 1  |
|              | 9-bp deletion      | Spain <sup>59</sup>                                                                                                                        | R                                       | 1  |
| 377          | GA insertion       | Peru <sup>32</sup>                                                                                                                         | R                                       | 1  |
| 378          | 10-bp deletion     | China <sup>47</sup>                                                                                                                        | R                                       | 1  |
| 379          | G>A                | Iran <sup>2</sup>                                                                                                                          | R                                       | 1  |
|              | G>T                | Thailand <sup>8</sup> , China <sup>34</sup>                                                                                                | R <sup>8,34</sup>                       | 2  |
|              | 30-bp deletion     | Mexico <sup>26</sup>                                                                                                                       | R                                       | 1  |
|              | 11-bp deletion     | Russia <sup>4</sup>                                                                                                                        | R                                       | 1  |
| 380          | 9-bp deletion      | Mexico <sup>26</sup>                                                                                                                       | R                                       | 1  |
|              | 11-bp deletion     | Korea <sup>20</sup>                                                                                                                        | R                                       | 1  |
| 381          | GG deletion        | Korea <sup>6</sup>                                                                                                                         | R                                       | 1  |
|              | 9-bp deletion      | Portugal <sup>35</sup>                                                                                                                     | R                                       | 1  |
| 382          | AG insertion       | Korea <sup>6,7</sup>                                                                                                                       | R <sup>6,7</sup>                        | 2  |
|              | 8-bp deletion      | Japan <sup>36</sup>                                                                                                                        | R                                       | 1  |
|              | 9-bp deletion      | India <sup>50</sup> , Cuba <sup>56</sup>                                                                                                   | R <sup>50,56</sup>                      | 2  |
| 383          | T>G                | New Zealand <sup>45</sup> , Japan <sup>46</sup> ,<br>Sweden <sup>57</sup>                                                                  | R <sup>45,46,57</sup>                   | 3  |
|              | 9-bp deletion      | USA <sup>39</sup>                                                                                                                          | R                                       | 1  |
| 385          | 5-bp deletion      | Korea <sup>20</sup>                                                                                                                        | R                                       | 1  |
|              | CG deletion        | Japan <sup>46</sup>                                                                                                                        | R                                       | 1  |
| 385 &<br>420 | T>G & GG insertion | USA <sup>12</sup>                                                                                                                          | R                                       | 1  |
| 386          | T>G                | Brazil <sup>17</sup>                                                                                                                       | R                                       | 1  |
|              | 4-bp deletion      | Korea <sup>6</sup>                                                                                                                         | R                                       | 1  |
| 388          | 9-bp insertion     | Brazil <sup>23</sup> , USA <sup>33</sup>                                                                                                   | R <sup>23,33</sup>                      | 2  |
| 389          | T>C                | Korea <sup>1</sup> , China <sup>34,47</sup>                                                                                                | R <sup>1,34,47</sup>                    | 4  |
|              | T>G                | Canada <sup>22</sup> , USA <sup>33</sup> , Thailand <sup>65</sup>                                                                          | R <sup>22,33,65</sup>                   | 4  |
|              | G insertion        | India <sup>50</sup>                                                                                                                        | R                                       | 1  |
|              | GG insertion       | Korea <sup>20</sup> , South Africa <sup>24</sup> , India <sup>50</sup>                                                                     | R <sup>20,24,50</sup>                   | 12 |
| 390          | GG insertion       | Mexico <sup>26</sup>                                                                                                                       | R                                       | 1  |
| 391          | G>T                | Korea <sup>20</sup>                                                                                                                        | R                                       | 1  |
|              | GG insertion       | Korea <sup>6</sup> , Portugal <sup>9</sup> , France <sup>37</sup> ,<br>Sweden <sup>38,57</sup> , Japan <sup>46</sup> , China <sup>47</sup> | R <sup>6,9,37,38,46,47,57</sup>         | 8  |
|              | G insertion        | Mexico <sup>26</sup> , China <sup>34</sup> , Poland <sup>66</sup>                                                                          | R <sup>26,47,66</sup>                   | 3  |
| 392          | G insertion        | Korea <sup>6</sup> , Portugal <sup>35</sup>                                                                                                | R <sup>6,35</sup>                       | 2  |
|              | GG insertion       | Canada <sup>64</sup>                                                                                                                       | R                                       | 1  |
| 393          | GT insertion       | Korea <sup>7</sup>                                                                                                                         | R                                       | 1  |
|              | T insertion        | Korea <sup>7</sup>                                                                                                                         | R                                       | 1  |
|              | 1-bp deletion      | Korea <sup>1</sup>                                                                                                                         | R                                       | 1  |
| 394          | G>A                | South Africa <sup>3</sup> , Taiwan <sup>18</sup> , Japan <sup>19</sup> ,<br>China <sup>34</sup> , Sweden <sup>38,61</sup>                  | R <sup>3,18,19,34,38,61</sup>           | 7  |
| 395          | G>T                | Iran <sup>2</sup> , Korea <sup>7</sup>                                                                                                     | R <sup>2,8</sup>                        | 3  |
|              | G>A                | Portugal <sup>9</sup> , Taiwan <sup>18</sup> , Korea <sup>20</sup> ,                                                                       | R <sup>9,18,20,22,37,64</sup>           | 7  |



|              |                     |                                                                                                                                                                                                      |                                              |    |
|--------------|---------------------|------------------------------------------------------------------------------------------------------------------------------------------------------------------------------------------------------|----------------------------------------------|----|
|              |                     | Myanmar <sup>22</sup> , France <sup>37</sup> , Canada <sup>64</sup>                                                                                                                                  |                                              |    |
|              | G>C                 | China <sup>31</sup> , Sweden <sup>38,57,61</sup> , India <sup>50</sup>                                                                                                                               | R <sup>31,38,50,57,61</sup>                  | 5  |
|              | 9-bp insertion      | Canada <sup>64</sup>                                                                                                                                                                                 | R                                            | 1  |
|              | 17-bp deletion      | India <sup>22</sup>                                                                                                                                                                                  | R                                            | 1  |
| 396          | T insertion         | China <sup>48</sup>                                                                                                                                                                                  | R                                            | 1  |
|              | TC insertion        | India <sup>58</sup>                                                                                                                                                                                  | R                                            | 3  |
| 397          | G insertion         | Taiwan <sup>29</sup>                                                                                                                                                                                 | R                                            | 1  |
| 398          | T>C                 | Russia <sup>4</sup> , Japan <sup>19</sup> , Portugal <sup>35</sup> ,<br>China <sup>63</sup>                                                                                                          | R <sup>4,19,35,63</sup>                      | 5  |
|              | T>G                 | Brazil <sup>11</sup>                                                                                                                                                                                 | R                                            | 1  |
|              | T>A                 | USA <sup>33</sup>                                                                                                                                                                                    | R                                            | 1  |
|              | TT deletion         | South Africa <sup>21</sup>                                                                                                                                                                           | R                                            | 1  |
| 399          | 163-bp deletion     | Singapore <sup>62</sup>                                                                                                                                                                              | R                                            | 1  |
| 401          | C>T                 | Canada <sup>12</sup> , Peru <sup>13</sup> , Taiwan <sup>18,29</sup> ,<br>USA <sup>33</sup>                                                                                                           | R <sup>12,13,18,29,33</sup>                  | 5  |
| 403          | A>C                 | Korea <sup>1,6,7,20</sup> , China <sup>31</sup> , Peru <sup>32</sup> ,<br>USA <sup>33</sup> , Japan <sup>46</sup> , Poland <sup>66</sup>                                                             | R <sup>1,6,7,20,31,32,33,46,66</sup>         | 22 |
|              | A>G                 | Taiwan <sup>18</sup>                                                                                                                                                                                 | R                                            | 1  |
|              | CC insertion        | China <sup>15</sup>                                                                                                                                                                                  | R                                            | 1  |
| 404          | C>A                 | Poland <sup>66</sup>                                                                                                                                                                                 | R                                            | 3  |
| 406          | G>A                 | Korea <sup>6</sup> , Brazil <sup>54</sup>                                                                                                                                                            | R <sup>6,54</sup>                            | 3  |
|              | G>C                 | Portugal <sup>9</sup> , Scotland <sup>10</sup>                                                                                                                                                       | R <sup>9,10</sup>                            | 2  |
|              | G>T                 | Korea <sup>6</sup>                                                                                                                                                                                   | R                                            | 1  |
|              | G deletion          | Korea <sup>6</sup>                                                                                                                                                                                   | R                                            | 1  |
| 407          | A>G                 | Korea <sup>7,20</sup> , South Africa <sup>24</sup> ,<br>China <sup>31,63</sup>                                                                                                                       | R <sup>7,20,24,31</sup> , *R/S <sup>63</sup> | 6  |
|              | C insertion         | Azerbaijan <sup>10</sup>                                                                                                                                                                             | R                                            | 1  |
|              | GC insertion        | Japan <sup>46</sup>                                                                                                                                                                                  | R                                            | 1  |
| 408          | A insertion         | Korea <sup>1</sup> , China <sup>63</sup> , Canada <sup>64</sup>                                                                                                                                      | R <sup>1,63,64</sup>                         | 3  |
| 410          | A>C                 | Korea <sup>6</sup> , Bangladesh <sup>10</sup> , Japan <sup>14</sup> ,<br>Peru <sup>32</sup> , China <sup>47</sup> , India <sup>58</sup>                                                              | R <sup>6,10,14,32,47,58</sup>                | 7  |
|              | A>G                 | USA <sup>33</sup>                                                                                                                                                                                    | R                                            | 2  |
| 412          | T>C                 | Japan <sup>16,46</sup>                                                                                                                                                                               | R <sup>16,46</sup>                           | 2  |
|              | G insertion         | Thailand <sup>8</sup>                                                                                                                                                                                | R                                            | 1  |
|              | T deletion          | Japan <sup>46</sup>                                                                                                                                                                                  | R                                            | 1  |
| 413          | G>A                 | China <sup>15</sup> , Latvia <sup>25</sup> , USA <sup>33</sup> ,<br>Sweden <sup>38</sup> , India <sup>58</sup>                                                                                       | R <sup>15,25,33,38,58</sup>                  | 6  |
|              | G>C                 | Korea <sup>12</sup>                                                                                                                                                                                  | R                                            | 1  |
| 414          | T>A                 | Korea <sup>20</sup>                                                                                                                                                                                  | R                                            | 2  |
|              | T>C                 | Brazil <sup>17</sup>                                                                                                                                                                                 | R                                            | 2  |
|              | G insertion         | Korea <sup>6</sup>                                                                                                                                                                                   | R                                            | 1  |
| 415          | G>C                 | China <sup>15,31</sup> , Mexico <sup>26</sup> , USA <sup>33</sup> ,<br>India <sup>58</sup>                                                                                                           | R <sup>15,26,31,33,58</sup>                  | 6  |
|              | G>A                 | Korea <sup>6,12</sup> , South Africa <sup>24</sup>                                                                                                                                                   | R <sup>6,12,24</sup>                         | 6  |
|              | G>T                 | Japan <sup>46</sup>                                                                                                                                                                                  | R                                            | 1  |
| 415 &<br>418 | G deletion & C>T    | India <sup>50</sup>                                                                                                                                                                                  | R                                            | 1  |
| 416          | T>C                 | China <sup>15,31,47</sup> , Taiwan <sup>18</sup> , Korea <sup>20</sup> ,<br>Malaysia <sup>22</sup> , South Africa <sup>30</sup> ,<br>Japan <sup>53</sup> , Cuba <sup>56</sup> , Poland <sup>66</sup> | R <sup>15,18,20,22,30,31,47,53,56,66</sup>   | 13 |
|              | T>G                 | Thailand <sup>8</sup> , China <sup>31,34,48</sup> , USA <sup>33</sup> ,<br>Portugal <sup>35</sup> , Spain <sup>59</sup> ,<br>South Africa <sup>60</sup> , Singapore <sup>62</sup>                    | R <sup>8,31,33,34,35,48,59,60,62</sup>       | 13 |
| 418          | G insertion         | Korea <sup>1,20</sup>                                                                                                                                                                                | R <sup>1,20</sup>                            | 3  |
| 418 &<br>446 | C>A & 8-bp deletion | Canada <sup>12,64</sup>                                                                                                                                                                              | R                                            | 24 |
| 419          | 68-bp deletion      | France <sup>37</sup>                                                                                                                                                                                 | R                                            | 1  |
| 420          | G insertion         | USA <sup>12</sup>                                                                                                                                                                                    | R                                            | 2  |
|              | GC insertion        | South Africa <sup>21</sup>                                                                                                                                                                           | R                                            | 1  |
| 421          | C>T                 | Korea <sup>6,7</sup> , Portugal <sup>9</sup>                                                                                                                                                         | R <sup>6,7,9</sup>                           | 3  |
| 422          | A>C                 | Korea <sup>1,6,20</sup> , Russia <sup>4</sup> , USA <sup>12</sup> ,<br>China <sup>31,47</sup> , India <sup>58</sup>                                                                                  | R <sup>1,4,6,12,20,31,47,58</sup>            | 10 |
|              | C deletion          | Brazil <sup>17</sup>                                                                                                                                                                                 | R                                            | 1  |
| 424          | A>G                 | Myanmar <sup>22</sup> , China <sup>34,47</sup> , Poland <sup>66</sup>                                                                                                                                | R <sup>22,34,47,66</sup>                     | 4  |
| 425          | C>A                 | China <sup>15</sup> , Thailand <sup>22</sup> , Sweden <sup>38,61</sup>                                                                                                                               | R <sup>15,22,38,61</sup>                     | 7  |
|              | C>T                 | Thailand <sup>8</sup> , Bangladesh <sup>10</sup> , Korea <sup>20</sup> ,<br>New Zealand <sup>45</sup> , India <sup>58</sup>                                                                          | R <sup>8,10,20,45,58</sup>                   | 6  |
| 426          | AG insertion        | India <sup>58</sup>                                                                                                                                                                                  | R                                            | 1  |
| 427          | G>A                 | Iran <sup>2</sup>                                                                                                                                                                                    | R                                            | 1  |
|              | G>C                 | Mexico <sup>26</sup>                                                                                                                                                                                 | R                                            | 1  |
| 428          | C>G                 | Italy <sup>40</sup>                                                                                                                                                                                  | R                                            | 1  |
|              | GG insertion        | Korea <sup>12</sup>                                                                                                                                                                                  | R                                            | 1  |

|              |                                  |                                                                                                                                                                                                      |                                                   |    |
|--------------|----------------------------------|------------------------------------------------------------------------------------------------------------------------------------------------------------------------------------------------------|---------------------------------------------------|----|
| 430          | GAG deletion                     | Netherlands <sup>41</sup>                                                                                                                                                                            | R                                                 | 1  |
|              | 6-bp deletion                    | Poland <sup>66</sup>                                                                                                                                                                                 | R                                                 | 2  |
| 436          | G>A                              | Korea <sup>6,20</sup> , Thailand <sup>8,52</sup> , China <sup>63</sup>                                                                                                                               | R <sup>6,8,20,52,63</sup>                         | 7  |
| 437          | C>T                              | India <sup>22</sup>                                                                                                                                                                                  | R                                                 | 1  |
| 439          | CG insertion                     | Portugal <sup>9,35</sup>                                                                                                                                                                             | R <sup>9,35</sup>                                 | 4  |
| 440          | 1-bp deletion                    | Mexico <sup>26</sup>                                                                                                                                                                                 | R                                                 | 1  |
| 442          | C>A                              | Poland <sup>19</sup> , Turkey <sup>44</sup>                                                                                                                                                          | R <sup>19,44</sup>                                | 2  |
|              | C>T                              | Taiwan <sup>18</sup>                                                                                                                                                                                 | R                                                 | 1  |
| 444          | CG insertion                     | Brazil <sup>23</sup>                                                                                                                                                                                 | R                                                 | 1  |
|              | 12-bp insertion                  | Sweden <sup>38,57</sup>                                                                                                                                                                              | R <sup>38,57</sup>                                | 2  |
| 448          | GC insertion                     | Korea <sup>20</sup>                                                                                                                                                                                  | R                                                 | 2  |
| 449          | G deletion                       | Japan <sup>46</sup>                                                                                                                                                                                  | R                                                 | 1  |
| 451          | T deletion                       | Korea <sup>20</sup>                                                                                                                                                                                  | R                                                 | 1  |
| 452          | T>C                              | South Africa <sup>3</sup> , China <sup>34,63</sup> ,<br>Canada <sup>64</sup>                                                                                                                         | R <sup>3,34,63,65</sup>                           | 6  |
|              | T deletion                       | Korea <sup>6</sup>                                                                                                                                                                                   | R                                                 | 1  |
| 454          | G>A                              | Korea <sup>5</sup>                                                                                                                                                                                   | R                                                 | 1  |
| 456          | T insertion                      | Brazil <sup>54</sup>                                                                                                                                                                                 | R                                                 | 2  |
| 457          | C>G                              | Brazil <sup>23</sup>                                                                                                                                                                                 | R                                                 | 1  |
| 458          | C>A                              | USA <sup>33</sup>                                                                                                                                                                                    | R                                                 | 1  |
|              | C>T                              | China <sup>47</sup>                                                                                                                                                                                  | R                                                 | 2  |
| 458 &<br>474 | C>T & C>A                        | China <sup>48</sup>                                                                                                                                                                                  | R                                                 | 1  |
| 460          | A>G                              | Korea <sup>1</sup> , South Africa <sup>3,60</sup> , Russia <sup>4</sup> ,<br>China <sup>34</sup>                                                                                                     | R <sup>1,3,4,34,60</sup>                          | 5  |
| 461          | G>C                              | Taiwan <sup>18</sup>                                                                                                                                                                                 | R                                                 | 1  |
| 463          | G>T                              | Korea <sup>20</sup>                                                                                                                                                                                  | R                                                 | 1  |
|              | G>A                              | New Zealand <sup>45</sup> , Canada <sup>64</sup>                                                                                                                                                     | R <sup>45,64</sup>                                | 3  |
| 464          | T>G                              | Iran <sup>2</sup> , Korea <sup>6,12</sup> , Brazil <sup>11,17,49</sup> ,<br>Taiwan <sup>29</sup> , France <sup>37</sup> , Sweden <sup>38,57,61</sup> ,<br>Belgium <sup>43</sup> , Cuba <sup>56</sup> | R <sup>2,6,11,12,17,29,37,38,43,49,56,57,61</sup> | 18 |
|              | T>C                              | Korea <sup>20</sup>                                                                                                                                                                                  | *R/S                                              | 1  |
|              | T insertion                      | Italy <sup>40</sup>                                                                                                                                                                                  | R                                                 | 2  |
| 465          | T insertion                      | Korea <sup>6</sup>                                                                                                                                                                                   | R                                                 | 2  |
| 467          | T>A                              | Japan <sup>46</sup>                                                                                                                                                                                  | R                                                 | 1  |
| 470          | T>G                              | Korea <sup>1</sup>                                                                                                                                                                                   | R                                                 | 1  |
|              | T>C                              | Poland <sup>66</sup>                                                                                                                                                                                 | R                                                 | 2  |
| 472          | T>G                              | Thailand <sup>65</sup>                                                                                                                                                                               | R                                                 | 1  |
| 476          | T>C                              | South Africa <sup>3,24</sup> , Portugal <sup>9</sup> ,<br>China <sup>34</sup>                                                                                                                        | R <sup>3,9,24,34</sup>                            | 11 |
|              | T>G                              | Korea <sup>6,20</sup> , China <sup>31</sup>                                                                                                                                                          | R <sup>6,20,31</sup>                              | 18 |
| 478          | A>C                              | Iran <sup>2</sup> , Russia <sup>4</sup>                                                                                                                                                              | R <sup>2,4</sup>                                  | 3  |
| 479          | C>A                              | Mexico <sup>26</sup> , Turkey <sup>27</sup>                                                                                                                                                          | R <sup>26,27</sup>                                | 2  |
| 480          | TGAC insertion                   | Korea <sup>6</sup>                                                                                                                                                                                   | R                                                 | 1  |
| 481          | G>C                              | Russia <sup>4</sup>                                                                                                                                                                                  | R                                                 | 2  |
| 484          | G>A                              | China <sup>63</sup>                                                                                                                                                                                  | R                                                 | 1  |
| 484 &<br>494 | 9-bp deletion & 2-bp<br>deletion | Japan <sup>16</sup>                                                                                                                                                                                  | R                                                 | 1  |
| 485          | G>A                              | Brazil <sup>17</sup> , Hong Kong <sup>28</sup> , China <sup>31</sup> ,<br>USA <sup>39</sup>                                                                                                          | R <sup>17,28,31,39</sup>                          | 5  |
|              | GT deletion                      | Korea <sup>20</sup>                                                                                                                                                                                  | R                                                 | 1  |
| 486          | T insertion                      | Poland <sup>66</sup>                                                                                                                                                                                 | R                                                 | 1  |
|              | 10-bp deletion                   | Japan <sup>46</sup>                                                                                                                                                                                  | R                                                 | 1  |
| 487          | 10-bp deletion                   | Mexico <sup>26</sup>                                                                                                                                                                                 | R                                                 | 1  |
| 488          | T>C                              | India <sup>50</sup>                                                                                                                                                                                  | R                                                 | 1  |
| 489          | T insertion                      | Korea <sup>1</sup>                                                                                                                                                                                   | R                                                 | 1  |
| 490          | T>C                              | Brazil <sup>11,49</sup>                                                                                                                                                                              | R <sup>11,49</sup>                                | 2  |
|              | T deletion                       | Peru <sup>32</sup>                                                                                                                                                                                   | R                                                 | 5  |
| 495          | C insertion                      | Brazil <sup>11</sup>                                                                                                                                                                                 | R                                                 | 1  |
| 497          | 1-bp insertion                   | Japan <sup>16</sup>                                                                                                                                                                                  | R                                                 | 1  |
| 499          | A>C                              | China <sup>47</sup>                                                                                                                                                                                  | R                                                 | 1  |
| 501          | CG insertion                     | China <sup>15</sup>                                                                                                                                                                                  | R                                                 | 1  |
| 502          | A>C                              | Korea <sup>20</sup> , China <sup>31</sup> , Netherlands <sup>41</sup> ,<br>Spain <sup>59</sup>                                                                                                       | R <sup>20,31,41,59</sup>                          | 6  |
| 503          | C>A                              | USA <sup>12</sup>                                                                                                                                                                                    | R                                                 | 1  |
| 511          | G>A                              | Portugal <sup>9</sup> , Bangladesh <sup>10</sup> , USA <sup>33</sup>                                                                                                                                 | R <sup>9,10,33</sup>                              | 3  |
|              | G>C                              | India <sup>38</sup>                                                                                                                                                                                  | R                                                 | 1  |
| 512          | C>A                              | Korea <sup>1</sup> , Brazil <sup>17</sup> , China <sup>48</sup>                                                                                                                                      | R <sup>1,17,48</sup>                              | 5  |
|              | C>T                              | China <sup>63</sup> , Canada <sup>64</sup>                                                                                                                                                           | *R/S <sup>63</sup> , R <sup>64</sup>              | 3  |
|              | C deletion                       | Rwanda <sup>10</sup>                                                                                                                                                                                 | R                                                 | 1  |
| 513          | GC deletion                      | Korea <sup>7</sup>                                                                                                                                                                                   | R                                                 | 1  |
| 514 &        | C>G & T>C                        | Belgium <sup>10</sup>                                                                                                                                                                                | R                                                 | 2  |

|     |               |                                                                                                                                                                                           |                                            |    |
|-----|---------------|-------------------------------------------------------------------------------------------------------------------------------------------------------------------------------------------|--------------------------------------------|----|
| 515 |               |                                                                                                                                                                                           |                                            |    |
| 515 | T>C           | Korea <sup>6</sup> , Canada <sup>22</sup> , Brazil <sup>23</sup> , USA <sup>33,39</sup> , Sweden <sup>38,61</sup> , China <sup>48</sup> , Cuba <sup>56</sup> , South Africa <sup>60</sup> | R <sup>6,22,23,33,338,39,48,56,60,61</sup> | 15 |
|     | T>G           | Belgium <sup>43</sup> , Poland <sup>66</sup>                                                                                                                                              | R <sup>43,66</sup>                         | 5  |
|     | T deletion    | South Africa <sup>3</sup>                                                                                                                                                                 | R                                          | 1  |
| 516 | G insertion   | Netherlands <sup>41</sup>                                                                                                                                                                 | R                                          | 1  |
| 520 | G>T           | Korea <sup>20</sup>                                                                                                                                                                       | R                                          | 2  |
| 521 | A>G           | China <sup>31</sup>                                                                                                                                                                       | R                                          | 1  |
|     | GG insertion  | Thailand <sup>8</sup>                                                                                                                                                                     | R                                          | 1  |
|     | T insertion   | Peru <sup>32</sup>                                                                                                                                                                        | R                                          | 1  |
| 523 | A>G           | Japan <sup>19</sup> , Brazil <sup>23</sup> , Belgium <sup>43</sup> , Poland <sup>66</sup>                                                                                                 | R <sup>19,23,43,66</sup>                   | 7  |
| 524 | T>G           | Korea <sup>20</sup>                                                                                                                                                                       | R                                          | 1  |
|     | T>C           | Sweden <sup>38,61</sup>                                                                                                                                                                   | R <sup>38,61</sup>                         | 2  |
| 525 | G>A           | China <sup>31</sup> , Belgium <sup>43</sup> , Brazil <sup>54</sup>                                                                                                                        | R <sup>31,54</sup> , *R/S <sup>43</sup>    | 4  |
| 529 | A>C           | Taiwan <sup>18</sup>                                                                                                                                                                      | R                                          | 1  |
| 530 | C deletion    | Belgium <sup>43</sup>                                                                                                                                                                     | R                                          | 2  |
| 531 | 6-bp deletion | Poland <sup>66</sup>                                                                                                                                                                      | R                                          | 3  |
| 532 | C insertion   | Korea <sup>6</sup>                                                                                                                                                                        | R                                          | 1  |
| 535 | A>C           | Iran <sup>2</sup> , South Africa <sup>24</sup>                                                                                                                                            | R <sup>2,24</sup>                          | 3  |
| 537 | G>T           | Latvia <sup>25</sup>                                                                                                                                                                      | R                                          | 1  |
| 538 | G>T           | Korea <sup>6</sup> , China <sup>47</sup> , India <sup>50</sup> , Canada <sup>64</sup>                                                                                                     | R <sup>6,47,50,64</sup>                    | 5  |
| 542 | A deletion    | China <sup>34</sup>                                                                                                                                                                       | R                                          | 1  |
| 543 | G>T           | South Africa <sup>24</sup>                                                                                                                                                                | R                                          | 1  |
| 545 | T>C           | France <sup>37</sup>                                                                                                                                                                      | R                                          | 1  |
| 551 | G>A           | Taiwan <sup>18</sup>                                                                                                                                                                      | R                                          | 1  |
| 554 | G>C           | South Africa <sup>24</sup>                                                                                                                                                                | R                                          | 8  |
| 559 | T>G           | India <sup>50</sup>                                                                                                                                                                       | R                                          | 1  |
| 564 | G>C           | Brazil <sup>54</sup>                                                                                                                                                                      | R                                          | 1  |
| 572 | G>A           | Iran <sup>2</sup>                                                                                                                                                                         | R                                          | 1  |
| 573 | A>C           | Canada <sup>64</sup>                                                                                                                                                                      | R                                          | 1  |
| 582 | T deletion    | South Africa <sup>3</sup>                                                                                                                                                                 | R                                          | 1  |

### Supplementary references:

1. Kim HJ, Kwak HK, Lee J, Yun YJ, Lee JS, Lee MS, et al. Patterns of *pncA* mutations in drug-resistant *Mycobacterium tuberculosis* isolated from patients in South Korea. *International Journal of Tuberculosis and Lung Disease*. 2012;16(1):98-103.
2. Doustdar F, Khosravi AD, Farnia P. *Mycobacterium tuberculosis* Genotypic Diversity in Pyrazinamide-Resistant Isolates of Iran. *Microbial Drug Resistance*. 2009;15(4):251-6.
3. Mphahlele M, Syre H, Valvatne H, Stavrum R, Mannsaker T, Muthivhi T, et al. Pyrazinamide resistance among South African multidrug-resistant *Mycobacterium tuberculosis* isolates. *Journal of Clinical Microbiology*. 2008;46(10):3459-64.
4. Marttila HJ, Marjamaki M, Vyshnevskaya E, Vyshnevskiy BI, Otten TF, Vasilyef AV, et al. *pncA* mutations in pyrazinamide-resistant *Mycobacterium tuberculosis* isolates from northwestern Russia. *Antimicrobial Agents and Chemotherapy*. 1999;43(7):1764-6.
5. Choi J-H, Lee KW, Kang H-R, Hwang YI, Jang S, Kim D-G, et al. Clinical Efficacy of Direct DNA Sequencing Analysis on Sputum Specimens for Early Detection of Drug-Resistant *Mycobacterium tuberculosis* in a Clinical Setting. *Chest*. 2010;137(2):393-400.
6. Lee KW, Lee JM, Jung KS. Characterization of *pncA* mutations of pyrazinamide-resistant *Mycobacterium tuberculosis* in Korea. *Journal of Korean Medical Science*. 2001;16(5):537-43.
7. Park SK, Lee JY, Chang CL, Lee MK, Son HC, Kim CM, et al. *pncA* mutations in clinical *Mycobacterium tuberculosis* isolates from Korea. *Bmc Infectious Diseases*. 2001;1:art. no.-4.
8. Jonmalung J, Prammananan T, Leechawengwongs M, Chaiprasert A. Surveillance of pyrazinamide susceptibility among multidrug-resistant *Mycobacterium tuberculosis* isolates from Siriraj Hospital, Thailand. *Bmc Microbiology*. 2010;10.
9. Portugal I, Barreiro L, Moniz-Pereira J, Brum L. *pncA* mutations in pyrazinamide-resistant *Mycobacterium tuberculosis* isolates in Portugal. *Antimicrobial Agents and Chemotherapy*. 2004;48(7):2736-8.
10. Mestdagh M, Fonteyne PA, Realini L, Rossau R, Jannes G, Mijs W, et al. Relationship between pyrazinamide resistance, loss of pyrazinamidase activity, and mutations in the *pncA* locus in multidrug-

- resistant clinical isolates of *Mycobacterium tuberculosis*. *Antimicrobial Agents and Chemotherapy*. 1999;43(9):2317-9.
11. Barco P, Cardoso RF, Hirata RDC, Leite CQF, Pandolfi JR, Sato DN, et al. *pncA* mutations in pyrazinamide-resistant *Mycobacterium tuberculosis* clinical isolates from the southeast region of Brazil. *Journal of Antimicrobial Chemotherapy*. 2006;58(5):930-5.
  12. Cheng SJ, Thibert L, Sanchez T, Heifets L, Zhang Y. *pncA* mutations as a major mechanism of pyrazinamide resistance in *Mycobacterium tuberculosis*: Spread of a monoresistant strain in Quebec, Canada. *Antimicrobial Agents and Chemotherapy*. 2000;44(3):528-32.
  13. Escalante P, Ramaswamy S, Sanabria H, Soini H, Pan X, Valiente-Castillo O, et al. Genotypic characterization of drug-resistant *Mycobacterium tuberculosis* isolates from Peru. *Tubercle and lung disease : the official journal of the International Union against Tuberculosis and Lung Disease*. 1998;79(2):111-8.
  14. Ando H, Mitarai S, Kondo Y, Suetake T, Sekiguchi JI, Kato S, et al. Pyrazinamide resistance in multidrug-resistant *Mycobacterium tuberculosis* isolates in Japan. *Clinical microbiology and infection : the official publication of the European Society of Clinical Microbiology and Infectious Diseases*. 2010;16(8):1164-8.
  15. Hou L, Osei-Hyiaman D, Zhang Z, Wang B, Yang A, Kano K. Molecular characterization of *pncA* gene mutations in *Mycobacterium tuberculosis* clinical isolates from China. *Epidemiology and Infection*. 2000;124(2):227-32.
  16. Miyagi C, Yamane N, Yogesh B, Ano H, Takashima T. Genetic and phenotypic characterization of pyrazinamide-resistant *Mycobacterium tuberculosis* complex isolates in Japan. *Diagnostic Microbiology and Infectious Disease*. 2004;48(2):111-6.
  17. Rodrigues V, Telles MA, Ribeiro MO, Cafrune PU, Rossetti MLR, Zaha A. Characterization of *pncA* mutations in pyrazinamide-resistant *Mycobacterium tuberculosis* in Brazil. *Antimicrobial Agents and Chemotherapy*. 2005;49(1):444-6.
  18. Chiu Y-C, Huang S-F, Yu K-W, Lee Y-C, Feng J-Y, Su W-J. Characteristics of *pncA* mutations in multidrug-resistant tuberculosis in Taiwan. *Bmc Infectious Diseases*. 2011;11.
  19. Sekiguchi J-i, Miyoshi-Akiyama T, Augustynowicz-Kopec E, Zwolska Z, Kirikae F, Toyota E, et al. Detection of multidrug resistance in *Mycobacterium tuberculosis*. *Journal of Clinical Microbiology*. 2007;45(1):179-92.
  20. Jnawali HN, Hwang SC, Park YK, Kim H, Lee YS, Chung GT, et al. Characterization of mutations in multi- and extensive drug resistance among strains of *Mycobacterium tuberculosis* clinical isolates in Republic of Korea. *Diagnostic Microbiology and Infectious Disease*. 2013;76(2):187-96.
  21. Bishop KS, Blumberg L, Trollip AP, Smith AN, Roux L, York DF, et al. Characterisation of the *pncA* gene in *Mycobacterium tuberculosis* isolates from Gauteng, South Africa. *International Journal of Tuberculosis and Lung Disease*. 2001;5(10):952-7.
  22. Hirano K, Takahashi M, Kazumi Y, Fukasawa Y, Abe C. Mutation in *pncA* is a major mechanism of pyrazinamide resistance in *Mycobacterium tuberculosis*. *Tubercle and Lung Disease*. 1998;78(2):117-22.
  23. Bhujju S, Fonseca LdS, Marsico AG, de Oliveira Vieira GB, Sobral LF, Stehr M, et al. *Mycobacterium tuberculosis* isolates from Rio de Janeiro reveal unusually low correlation between pyrazinamide resistance and mutations in the *pncA* gene. *Infection Genetics and Evolution*. 2013;19:1-6.
  24. Louw GE, Warren RM, Donald PR, Murray MB, Bosman M, Van Heiden PD, et al. Frequency and implications of pyrazinamide resistance in managing previously treated tuberculosis patients. *International Journal of Tuberculosis and Lung Disease*. 2006;10(7):802-7.
  25. Tracevska T, Jansone I, Baumanis V, Nodieva A, Marga O, Skenders G. Spectrum of *pncA* mutations in multidrug-resistant *Mycobacterium tuberculosis* isolates obtained in Latvia. *Antimicrobial Agents and Chemotherapy*. 2004;48(8):3209-10.
  26. Cuevas-Cordoba B, Oyuki Xochihua-Gonzalez S, Cuellar A, Fuentes-Dominguez J, Zenteno-Cuevas R. Characterization of *pncA* gene mutations in pyrazinamide-resistant *Mycobacterium tuberculosis* isolates from Mexico. *Infection Genetics and Evolution*. 2013;19:330-4.
  27. Yuksel P, Tansel O. Characterization of *pncA* mutations of pyrazinamide-resistant *Mycobacterium tuberculosis* in Turkey. *New Microbiologica*. 2009;32(2):153-8.
  28. Chan RCY, Hui M, Chan EWC, Au TK, Chin ML, Yip CK, et al. Genetic and phenotypic characterization of drug-resistant *Mycobacterium tuberculosis* isolates in Hong Kong. *Journal of Antimicrobial Chemotherapy*. 2007;59(5):866-73.
  29. Huang TS, Lee SSJ, Tu HZ, Huang WK, Chen YS, Huang CK, et al. Correlation between pyrazinamide activity and *pncA* mutations in *Mycobacterium tuberculosis* isolates in Taiwan. *Antimicrobial Agents and Chemotherapy*. 2003;47(11):3672-3.

30. Davies AP, Billington OJ, McHugh TD, Mitchison DA, Gillespie SH. Comparison of phenotypic and genotypic methods for pyrazinamide susceptibility testing with *Mycobacterium tuberculosis*. *Journal of Clinical Microbiology*. 2000;38(10):3686-8.
31. Tan Y, Hu Z, Zhang T, Cai X, Kuang H, Liu Y, et al. Role of *pncA* and *rpsA* Gene Sequencing in Detection of Pyrazinamide Resistance in *Mycobacterium tuberculosis* Isolates from Southern China. *Journal of Clinical Microbiology*. 2014;52(1):291-7.
32. Sheen P, Mendez M, Gilman RH, Pena L, Caviedes L, Zimic MJ, et al. Sputum PCR-Single-Strand Conformational Polymorphism Test for Same-Day Detection of Pyrazinamide Resistance in Tuberculosis Patients. *Journal of Clinical Microbiology*. 2009;47(9):2937-43.
33. Morlock GP, Crawford JT, Butler WR, Brim SE, Sikes D, Mazurek GH, et al. Phenotypic characterization of *pncA* mutants of *Mycobacterium tuberculosis*. *Antimicrobial Agents and Chemotherapy*. 2000;44(9):2291-5.
34. Huang Z-k, Luo Q, Jiang B-x, Li W-t, Xu X-m, Xiong G-l, et al. Performance of the microscopic observation drug susceptibility assay in pyrazinamide susceptibility testing for *Mycobacterium tuberculosis*. *Chinese Medical Journal*. 2013;126(22):4334-9.
35. Perdigao J, Macedo R, Joao I, Fernandes E, Brum L, Portugal I. Multidrug-resistant tuberculosis in Lisbon, Portugal: A molecular epidemiological perspective. *Microbial Drug Resistance*. 2008;14(2):133-43.
36. Endoh T, Yagihashi A, Uehara N, Kobayashi D, Tsuji N, Nakamura M, et al. Pyrazinamide resistance associated with *pncA* gene mutation in *Mycobacterium tuberculosis* in Japan. *Epidemiology and Infection*. 2002;128(2):337-42.
37. Lemaitre N, Sougakoff W, Truffot-Pernot C, Jarlier V. Characterization of new mutations in pyrazinamide-resistant strains of *Mycobacterium tuberculosis* and identification of conserved regions important for the catalytic activity of the pyrazinamidase *PncA*. *Antimicrobial Agents and Chemotherapy*. 1999;43(7):1761-3.
38. Jureen P, Werngren J, Toro J-C, Hoffner S. Pyrazinamide resistance and *pncA* gene mutations in *Mycobacterium tuberculosis*. *Antimicrobial Agents and Chemotherapy*. 2008;52(5):1852-4.
39. Denkin S, Volokhov D, Chizhikov V, Zhang Y. Microarray-based *pncA* genotyping of pyrazinamide-resistant strains of *Mycobacterium tuberculosis*. *Journal of Medical Microbiology*. 2005;54(12):1127-31.
40. Piersimoni C, Mustazzolu A, Giannoni F, Bornigia S, Gherardi G, Fattorini L. Prevention of False Resistance Results Obtained in Testing the Susceptibility of *Mycobacterium tuberculosis* to Pyrazinamide with the Bactec MGIT 960 System Using a Reduced Inoculum. *Journal of Clinical Microbiology*. 2013;51(1):291-4.
41. Simons SO, van Ingen J, van der Laan T, Mulder A, Dekhuijzen PNR, Boeree MJ, et al. Validation of *pncA* Gene Sequencing in Combination with the Mycobacterial Growth Indicator Tube Method To Test Susceptibility of *Mycobacterium tuberculosis* to Pyrazinamide. *Journal of Clinical Microbiology*. 2012;50(2):428-34.
42. Zhdanova S, Heysell SK, Ogarkov O, Boyarinova G, Alexeeva G, Pholwat S, et al. Primary Multidrug-Resistant *Mycobacterium tuberculosis* in 2 Regions, Eastern Siberia, Russian Federation. *Emerging Infectious Diseases*. 2013;19(10):1649-52.
43. Stoffels K, Mathys V, Fauville-Dufaux M, Wintjens R, Bifani P. Systematic Analysis of Pyrazinamide-Resistant Spontaneous Mutants and Clinical Isolates of *Mycobacterium tuberculosis*. *Antimicrobial Agents and Chemotherapy*. 2012;56(10):5186-93.
44. Brown TJ, Tansel O, French GL. Simultaneous identification and typing of multi-drug-resistant *Mycobacterium tuberculosis* isolates by analysis of *pncA* and *rpoB*. *Journal of Medical Microbiology*. 2000;49(7):651-6.
45. Pandey S, Newton S, Upton A, Roberts S, Drinkovic D. Characterisation of *pncA* mutations in clinical *Mycobacterium tuberculosis* isolates in New Zealand. *Pathology*. 2009;41(6):582-4.
46. Suzuki Y, Suzuki A, Tamaru A, Katsukawa C, Oda H. Rapid detection of pyrazinamide-resistant *Mycobacterium tuberculosis* by a PCR-based *in vitro* system. *Journal of Clinical Microbiology*. 2002;40(2):501-7.
47. Zhang H, Bi LJ, Li CY, Sun ZG, Deng JY, Zhang XE. Mutations Found in the *pncA* Gene of *Mycobacterium tuberculosis* in Clinical Pyrazinamide-resistant Isolates from a Local Region of China. *Journal of International Medical Research*. 2009;37(5):1430-5.
48. Zhou M, Geng X, Chen J, Wang X, Wang D, Deng J, et al. Rapid Colorimetric Testing for Pyrazinamide Susceptibility of *M. tuberculosis* by a PCR-Based *In-Vitro* Synthesized Pyrazinamidase Method. *Plos One*. 2011;6(11).

49. Ghiraldi LD, Campanerut PAZ, Sposito FLE, Sato DN, Leite CQF, Hirata M, et al. Evaluation of the microscopic observation drug susceptibility assay for detection of *Mycobacterium tuberculosis* resistance to pyrazinamide. *Clinical Microbiology and Infection*. 2011;17(12):1792-7.
50. Shenai S, Rodrigues C, Sadani M, Sukhadia N, Mehta A. Comparison of phenotypic and genotypic methods for pyrazinamide susceptibility testing. *The Indian journal of tuberculosis*. 2009;56(2):82-90.
51. Li H, Chen J, Zhou M, Geng X, Yu J, Wang W, et al. Rapid Detection of *Mycobacterium tuberculosis* and Pyrazinamide Susceptibility Related to *pncA* Mutations in Sputum Specimens through an Integrated Gene-to-Protein Function Approach. *Journal of Clinical Microbiology*. 2014;52(1):260-7.
52. Pholwat S, Stroup S, Gratz J, Trangan V, Foongladda S, Kumburu H, et al. Pyrazinamide susceptibility testing of *Mycobacterium tuberculosis* by high resolution melt analysis. *Tuberculosis*. 2014;94(1):20-5.
53. Aono A, Hirano K, Hamasaki S, Abe C. Evaluation of BACTEC MGIT 960 PZA medium for susceptibility testing of *Mycobacterium tuberculosis* to pyrazinamide (PZA): compared with the results of pyrazinamidase assay and Kyokuto PZA test. *Diagnostic Microbiology and Infectious Disease*. 2002;44(4):347-52.
54. Clemente WT, Soares Lima SS, Palaci M, Silva MSN, Sumnienski Rodrigues VF, Dalla Costa ER, et al. Phenotypic and genotypic characterization of drug-resistant *Mycobacterium tuberculosis* strains. *Diagnostic Microbiology and Infectious Disease*. 2008;62(2):199-204.
55. Hannan MM, Desmond EP, Morlock GP, Mazurek GH, Crawford JT. Pyrazinamide-mono-resistant *Mycobacterium tuberculosis* in the United States. *Journal of Clinical Microbiology*. 2001;39(2):647-50.
56. Mirabal NC, Yzquierdo SL, Lemus D, Madruga M, Milian Y, Echemendia M, et al. Evaluation of Colorimetric Methods Using Nicotinamide for Rapid Detection of Pyrazinamide Resistance in *Mycobacterium tuberculosis*. *Journal of Clinical Microbiology*. 2010;48(8):2729-33.
57. Hoffner S, Angeby K, Sturegard E, Jonsson B, Johansson A, Sellin M, et al. Proficiency of drug susceptibility testing of *Mycobacterium tuberculosis* against pyrazinamide: the Swedish experience. *International Journal of Tuberculosis and Lung Disease*. 2013;17(11):1486-90.
58. Muthaiah M, Jagadeesan S, Ayalusamy N, Sreenivasan M, Prabhu SS, Muthuraj U, et al. Molecular Epidemiological Study of Pyrazinamide-Resistance in Clinical Isolates of *Mycobacterium tuberculosis* from South India. *International Journal of Molecular Sciences*. 2010;11(7):2670-80.
59. Aragon LM, Garrigo M, Moreno C, Espanol M, Coll P. Evaluation of the BacT/ALERT PZA kit in comparison with the BACTEC 460TB PZA for testing *Mycobacterium tuberculosis* susceptibility to pyrazinamide. *Journal of Antimicrobial Chemotherapy*. 2007;60(3):655-7.
60. Daum LT, Rodriguez JD, Worthy SA, Ismail NA, Omar SV, Dreyer AW, et al. Next-Generation Ion Torrent Sequencing of Drug Resistance Mutations in *Mycobacterium tuberculosis* Strains. *Journal of Clinical Microbiology*. 2012;50(12):3831-7.
61. Werngren J, Sturegard E, Jureen P, Angeby K, Hoffner S, Schon T. Reevaluation of the Critical Concentration for Drug Susceptibility Testing of *Mycobacterium tuberculosis* against Pyrazinamide Using Wild-Type MIC Distributions and *pncA* Gene Sequencing. *Antimicrobial Agents and Chemotherapy*. 2012;56(3):1253-7.
62. Lee ASG, Tang LLH, Lim IHK, Wong SY. Characterization of pyrazinamide and ofloxacin resistance among drug resistant *Mycobacterium tuberculosis* isolates from Singapore. *International journal of infectious diseases : IJID : official publication of the International Society for Infectious Diseases*. 2002;6(1):48-51.
63. Cui Z, Wang J, Lu J, Huang X, Zheng R, Hu Z. Evaluation of Methods for Testing the Susceptibility of Clinical *Mycobacterium tuberculosis* Isolates to Pyrazinamide. *Journal of Clinical Microbiology*. 2013;51(5):1374-80.
64. Alexander DC, Ma JH, Guthrie JL, Blair J, Chedore P, Jamieson FB. Gene Sequencing for Routine Verification of Pyrazinamide Resistance in *Mycobacterium tuberculosis*: a Role for *pncA* but Not *rpsA*. *Journal of Clinical Microbiology*. 2012;50(11):3726-8.
65. Watcharasamphankul W, Houtp ER, Foongladda S. Rapid detection of pyrazinamide resistant *Mycobacterium tuberculosis* by high resolution melting curve analysis. *Journal of the Medical Association of Thailand = Chotmaihet thangphaet*. 2013;96(9):1218-23.
66. Napiorkowska A, Ruesch-Gerdes S, Hillemann D, Richter E, Augustynowicz-Kopec E. Characterisation of pyrazinamide-resistant *Mycobacterium tuberculosis* strains isolated in Poland and Germany. *International Journal of Tuberculosis and Lung Disease*. 2014;18(4):454-60.
